# Supplementary material for: Antibacterial Polyketides from Antarctica Sponge-Derived Fungus Penicillium sp. HDN151272
Source: PubMed Central journal article supplement (PMC7073682; doi:10.3390/md18020071), 2020-01-23

Supporting Information for

# Antibacterial Polyketides from Antarctica Sponge-derived Fungus *Penicillium* sp. HDN151272

Mudassir Shah <sup>1,a</sup>, Chunxiao Sun <sup>1,a</sup>, Zichao sun <sup>1</sup>, Guojian Zhang <sup>1,2</sup>, Qian Che <sup>1</sup>, Tianjiao Zhu <sup>1\*</sup>, Qianqun Gu <sup>1</sup>, Dehai Li <sup>1,2,3\*</sup>

<sup>1</sup> Key Laboratory of Marine Drugs, Chinese Ministry of Education, School of Medicine and Pharmacy, Ocean University of China, Qingdao 266003, P. R. China.

<sup>2</sup> Laboratory for Marine Drugs and Bioproducts, Pilot National Laboratory for Marine Science and Technology, Qingdao, 266237, P. R. China

<sup>3</sup> Open Studio for Druggability Research of Marine Natural Products, Pilot National Laboratory for Marine Science and Technology, Qingdao, 266237, P. R. China; dehaili@ouc.edu.cn

\* Correspondence: dehaili@ouc.edu.cn (D.L.), zhutj@ouc.edu.cn (T. Z.); Tel.: 0086-532-82031619

<sup>a</sup> Contributed equally.

## Table of Contents

|                                                                                                               |    |
|---------------------------------------------------------------------------------------------------------------|----|
| Figure S1. HPLC analysis of the crude of HDN151272.....                                                       | 4  |
| Figure S2. The 18S rDNA sequences data of <i>Penicillium</i> sp. HDN151272.....                               | 4  |
| Figure S3. <sup>1</sup> H NMR (500 MHz, DMSO- <i>d</i> <sub>6</sub> ) spectrum of compound 1.....             | 5  |
| Figure S4. <sup>13</sup> C NMR (125 MHz, DMSO- <i>d</i> <sub>6</sub> ) spectrum of compound 1.....            | 5  |
| Figure S6. <sup>1</sup> H- <sup>1</sup> H COSY spectrum of compound 1 in DMSO- <i>d</i> <sub>6</sub> . ....   | 6  |
| Figure S7. HSQC spectrum of compound 1 in DMSO- <i>d</i> <sub>6</sub> .....                                   | 7  |
| Figure S8. <sup>1</sup> H- <sup>13</sup> C HMBC spectrum of compound 1 in DMSO- <i>d</i> <sub>6</sub> .....   | 7  |
| Figure S9. NOESY spectrum of compound 1 in DMSO- <i>d</i> <sub>6</sub> .....                                  | 8  |
| Figure S10. HRESIMS spectrum of compound 1. ....                                                              | 8  |
| Figure S11. IR spectrum of compound 1. ....                                                                   | 9  |
| Figure S12. UV spectrum of compound 1. ....                                                                   | 9  |
| Figure S13. <sup>1</sup> H NMR (500 MHz, DMSO- <i>d</i> <sub>6</sub> ) spectrum of compound 2.....            | 10 |
| Figure S14. <sup>13</sup> C NMR (125 MHz, DMSO- <i>d</i> <sub>6</sub> ) spectrum of compound 2.....           | 10 |
| Figure S15. DEPT (125 MHz, DMSO- <i>d</i> <sub>6</sub> ) spectrum of compound 2. ....                         | 11 |
| Figure S16. <sup>1</sup> H- <sup>1</sup> H COSY spectrum of compound 2 in DMSO- <i>d</i> <sub>6</sub> . ....  | 11 |
| Figure S17. HSQC spectrum of compound 2 in DMSO- <i>d</i> <sub>6</sub> .....                                  | 12 |
| Figure S18. <sup>1</sup> H- <sup>13</sup> C HMBC spectrum of compound 2 in DMSO- <i>d</i> <sub>6</sub> . .... | 12 |
| Figure S19. HRESIMS spectrum of compound 2. ....                                                              | 13 |
| Figure S20. IR spectrum of compound 2. ....                                                                   | 13 |
| Figure S21. UV spectrum of compound 2. ....                                                                   | 14 |
| Figure S23. <sup>13</sup> C NMR (125 MHz, DMSO- <i>d</i> <sub>6</sub> ) spectrum of compound 3.....           | 15 |
| Figure S24. DEPT (125 MHz, DMSO- <i>d</i> <sub>6</sub> ) spectrum of compound 3. ....                         | 15 |
| Figure S25. <sup>1</sup> H- <sup>1</sup> H COSY spectrum of compound 3 in DMSO- <i>d</i> <sub>6</sub> . ....  | 16 |
| Figure S26. HSQC spectrum of compound 3 in DMSO- <i>d</i> <sub>6</sub> .....                                  | 16 |
| Figure S27. <sup>1</sup> H- <sup>13</sup> C HMBC spectrum of compound 3 in DMSO- <i>d</i> <sub>6</sub> .....  | 17 |
| Figure S28. NOESY spectrum of compound 3 in DMSO- <i>d</i> <sub>6</sub> . ....                                | 17 |
| Figure S29. HRESIMS spectrum of compound 3. ....                                                              | 18 |
| Figure S30. IR spectrum of compound 3. ....                                                                   | 18 |

|                                                                                                                 |    |
|-----------------------------------------------------------------------------------------------------------------|----|
| <b>Figure S31.</b> UV spectrum of compound <b>3</b> . .....                                                     | 19 |
| <b>Figure S32.</b> $^1\text{H}$ NMR (500 MHz, $\text{CDCl}_3$ ) spectrum of compound <b>1</b> . .....           | 19 |
| <b>Figure S33.</b> $^{13}\text{C}$ NMR (125 MHz, $\text{CDCl}_3$ ) spectrum of compound <b>1</b> . .....        | 20 |
| <b>Figure S34.</b> DEPT (125 MHz, $\text{CDCl}_3$ ) spectrum of compound <b>1</b> . .....                       | 20 |
| <b>Figure S35.</b> $^1\text{H}$ - $^1\text{H}$ COSY spectrum of compound <b>1</b> in $\text{CDCl}_3$ . .....    | 21 |
| <b>Figure S36.</b> $^1\text{H}$ - $^{13}\text{C}$ HSQC spectrum of compound <b>1</b> in $\text{CDCl}_3$ . ..... | 21 |
| <b>Figure S37.</b> $^1\text{H}$ - $^{13}\text{C}$ HMBC spectrum of compound <b>1</b> in $\text{CDCl}_3$ . ..... | 22 |
| <b>Figure S38.</b> NOESY spectrum of compound <b>1</b> in $\text{CDCl}_3$ . .....                               | 22 |
| <b>Figure S39.</b> $^1\text{H}$ NMR (500 MHz, $\text{CDCl}_3$ ) spectrum of compound <b>2</b> . .....           | 23 |
| <b>Figure S40.</b> $^{13}\text{C}$ NMR (125 MHz, $\text{CDCl}_3$ ) spectrum of compound <b>2</b> . .....        | 23 |
| <b>Figure S41.</b> DEPT (125 MHz, $\text{CDCl}_3$ ) spectrum of compound <b>2</b> . .....                       | 24 |
| <b>Figure S42.</b> $^1\text{H}$ - $^1\text{H}$ COSY spectrum of compound <b>2</b> in $\text{CDCl}_3$ . .....    | 24 |
| <b>Figure S43.</b> HSQC spectrum of compound <b>2</b> in $\text{CDCl}_3$ . .....                                | 25 |
| <b>Figure S44.</b> $^1\text{H}$ - $^{13}\text{C}$ HMBC spectrum of compound <b>2</b> in $\text{CDCl}_3$ . ..... | 25 |
| <b>Figure S45.</b> NOESY spectrum of compound <b>2</b> in $\text{CDCl}_3$ . .....                               | 26 |
| <b>Figure S46.</b> $^1\text{H}$ NMR (500 MHz, $\text{CDCl}_3$ ) spectrum of compound <b>3</b> . .....           | 26 |
| <b>Figure S47.</b> $^{13}\text{C}$ NMR (125 MHz, $\text{CDCl}_3$ ) spectrum of compound <b>3</b> . .....        | 27 |
| <b>Figure S48.</b> DEPT (125 MHz, $\text{CDCl}_3$ ) spectrum of compound <b>3</b> . .....                       | 27 |
| <b>Figure S49.</b> $^1\text{H}$ - $^1\text{H}$ COSY spectrum of compound <b>3</b> in $\text{CDCl}_3$ . .....    | 28 |
| <b>Figure S50.</b> HSQC spectrum of compound <b>3</b> in $\text{CDCl}_3$ . .....                                | 28 |
| <b>Figure S51.</b> $^1\text{H}$ - $^{13}\text{C}$ HMBC spectrum of compound <b>3</b> in $\text{CDCl}_3$ . ..... | 29 |

**Figure S1.** HPLC analysis of the crude of HDN151272.

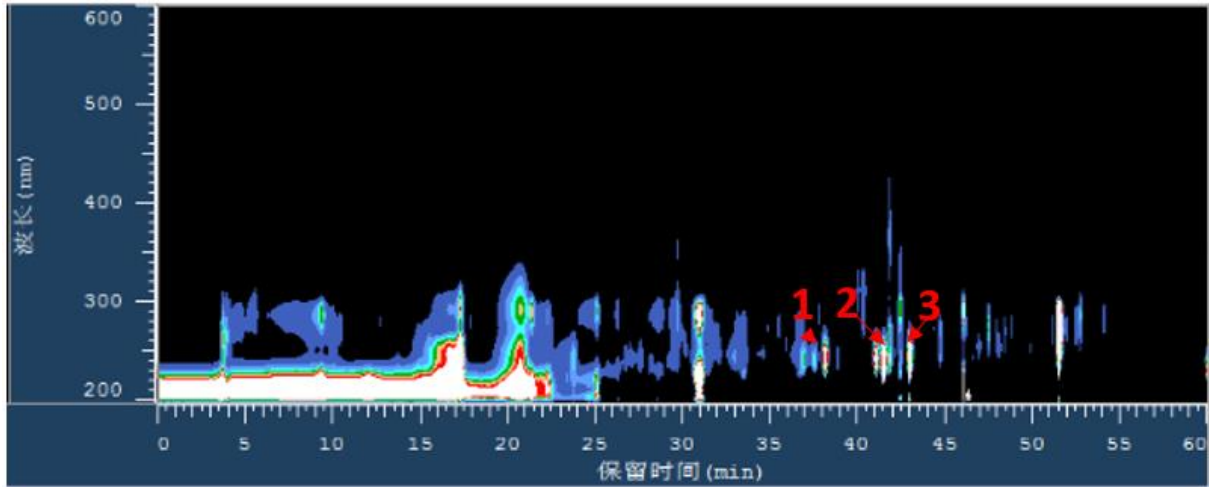

**Figure S2.** The 18S rDNA sequences data of *Penicillium* sp. HDN151272.

```
TGGCTCGACGAGGCTCTGGGTCACCTCCCACCCGTGTTTATTTTACCTTGTTGCTTCGGCGGGCCC
GCCTTAACTGGCCGCCGGGGGGCTTACGCCCCGGGCCCGCGCCCGCCGAAGACACCCTCGAAC
TCTGTCTGAAGATTGTAGTCTGAGTGAAAATATAAATTATTTAAACTTTCAACAACGGATCTCTT
GGTCCGGCATCGATGAAGAACGCAGCGAAATGCGATACGTAATGTGAATTGCAAATTCAGTGA
ATCATCGAGTCTTTGAACGCACATTGCGCCCCCTGGTATTCCGGGGGGCATGCCTGTCCGAGCGT
CATTCTGCCCTCAAGCACGGCTTGTGTGTTGGGCCCGTCTCCGATCCCGGGGGACGGGCCCCG
AAAGGCAGCGGCGGCACCGCGTCCGGTCTCGAGCGTATGGGGCTTTGTCACCCGCTCTGTAGGC
CCGGCCGGCGCTTGCCGATCAACCCAAATTTTTATCCAGGTTGACCTCGGATCAGGTAGGGATAC
CCGCTGAACTTAAGCATATCAATAAGCGGAGGAA
```

**Figure S3.**  $^1\text{H}$  NMR (500 MHz,  $\text{DMSO-}d_6$ ) spectrum of compound **1**.

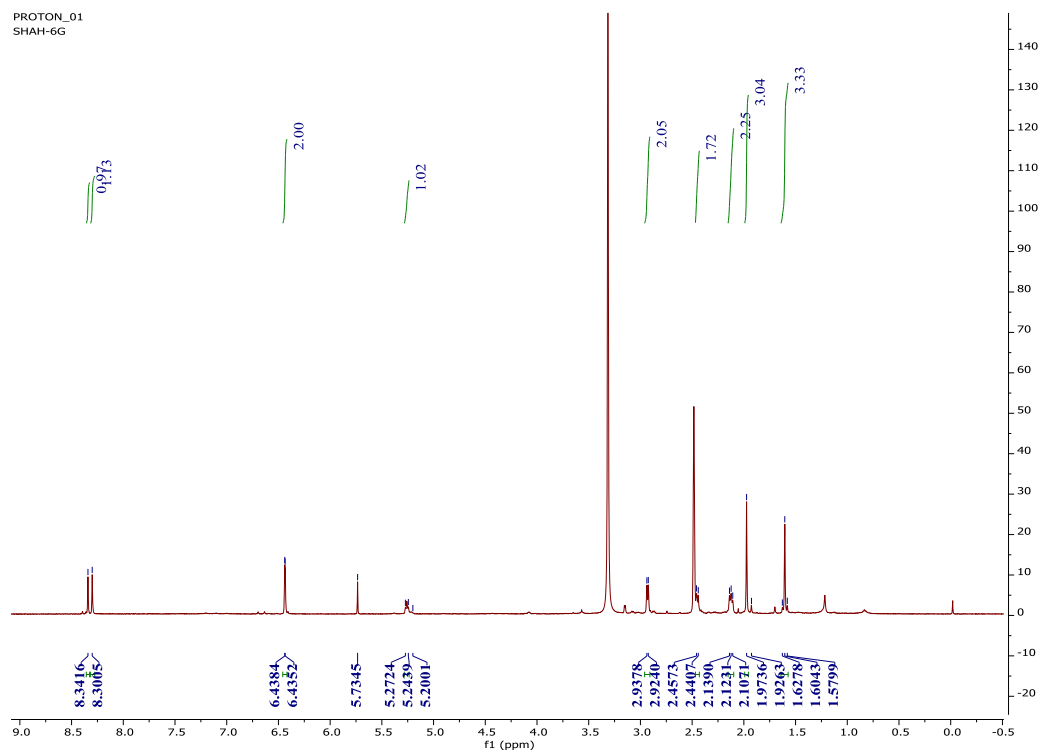

**Figure S4.**  $^{13}\text{C}$  NMR (125 MHz,  $\text{DMSO-}d_6$ ) spectrum of compound **1**.

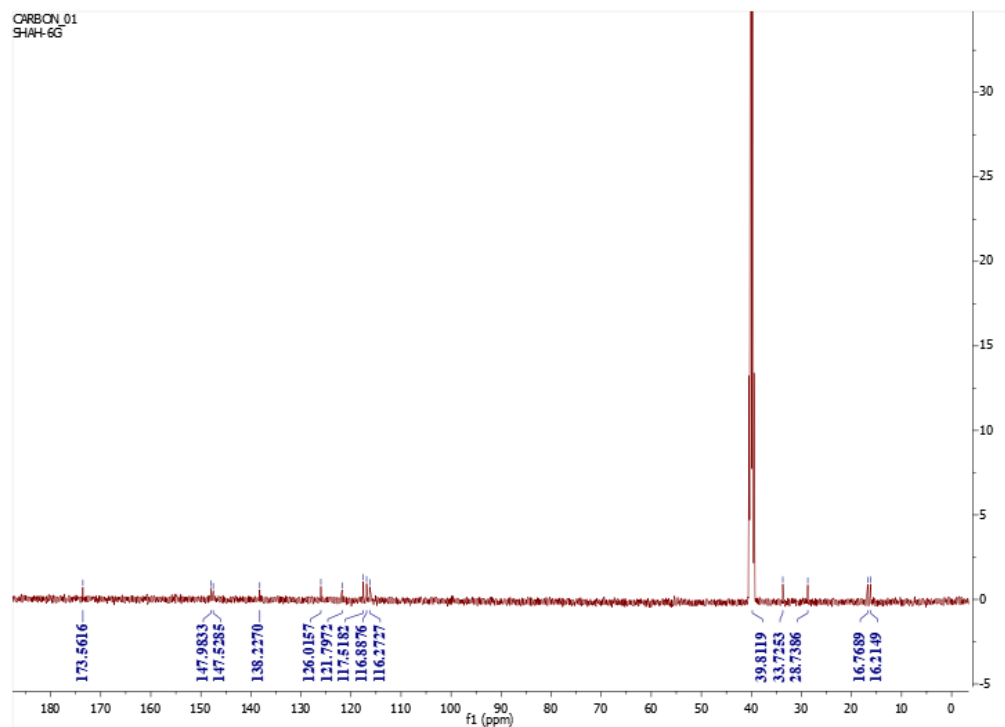

Figure S5. DEPT (125 MHz, DMSO-*d*<sub>6</sub>) spectrum of compound 1

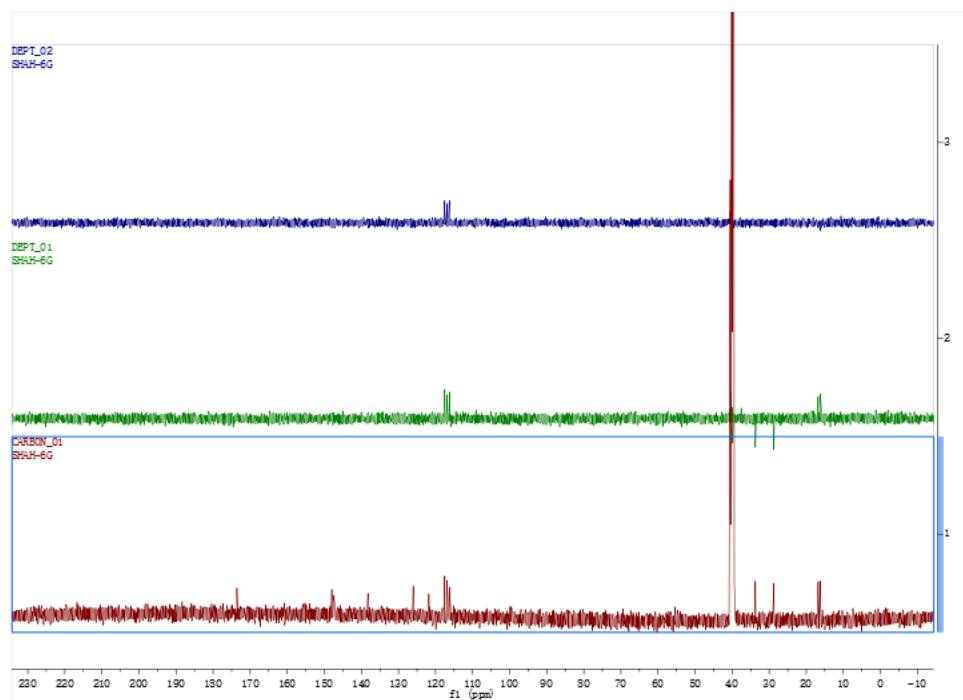

Figure S6. <sup>1</sup>H-<sup>1</sup>H COSY spectrum of compound 1 in DMSO-*d*<sub>6</sub>.

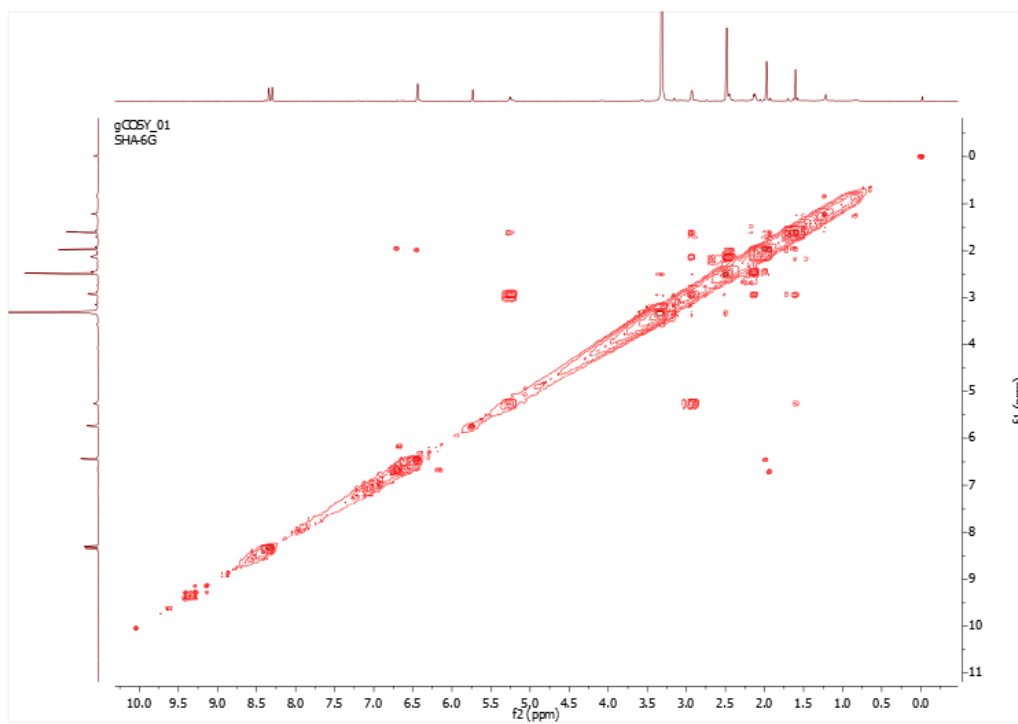

**Figure S7.** HSQC spectrum of compound **1** in DMSO-*d*<sub>6</sub>.

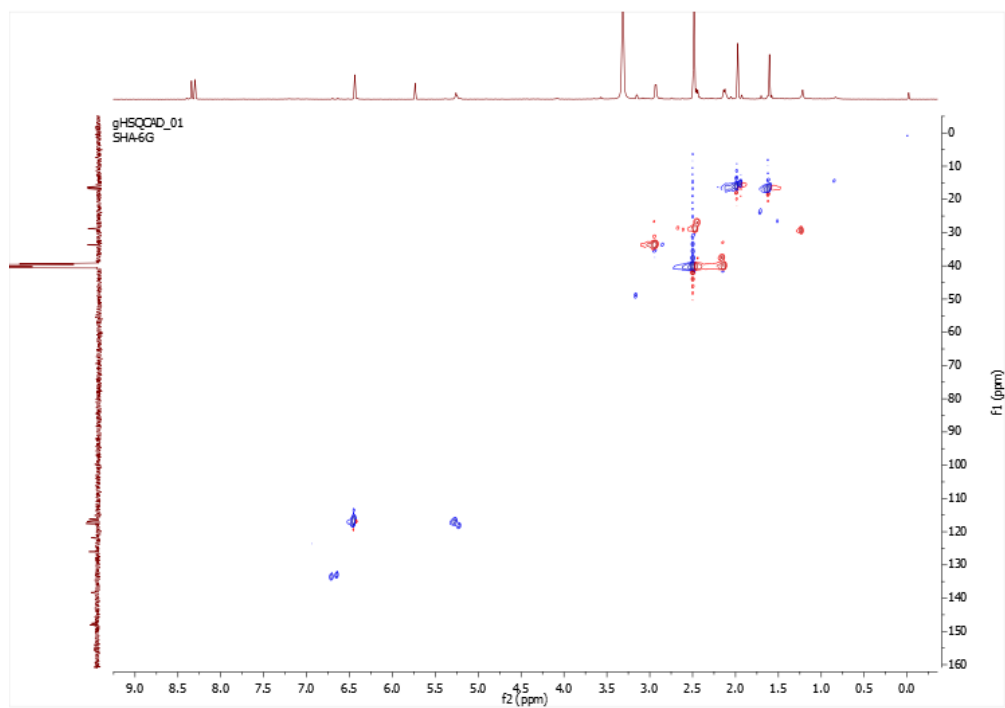

**Figure S8.** <sup>1</sup>H-<sup>13</sup>C HMBC spectrum of compound **1** in DMSO-*d*<sub>6</sub>

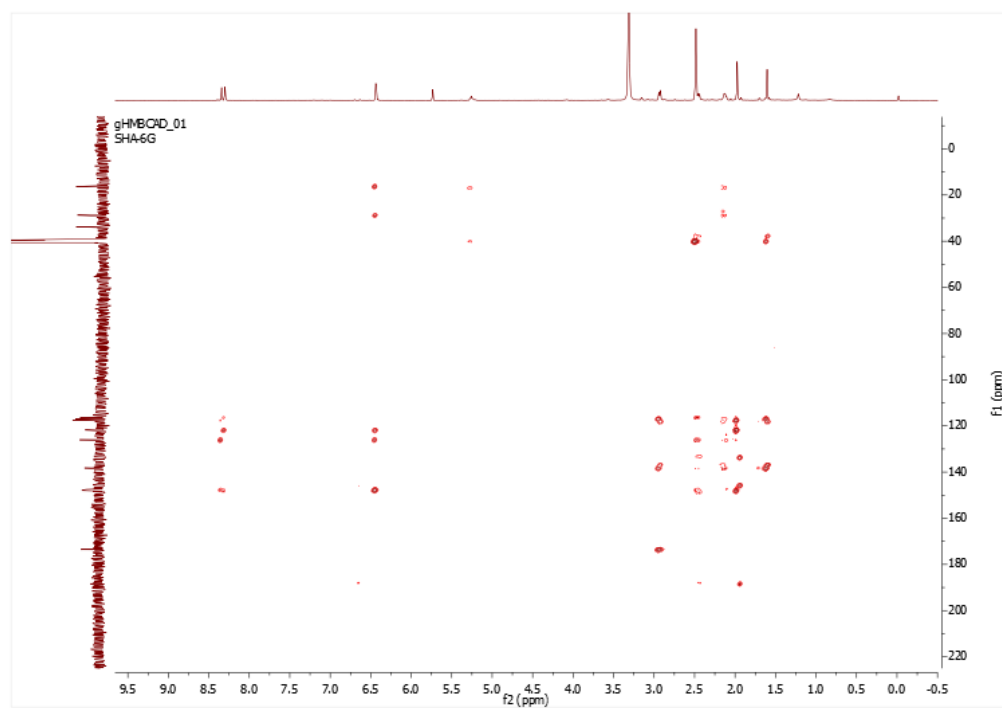

**Figure S9.** NOESY spectrum of compound **1** in DMSO- $d_6$

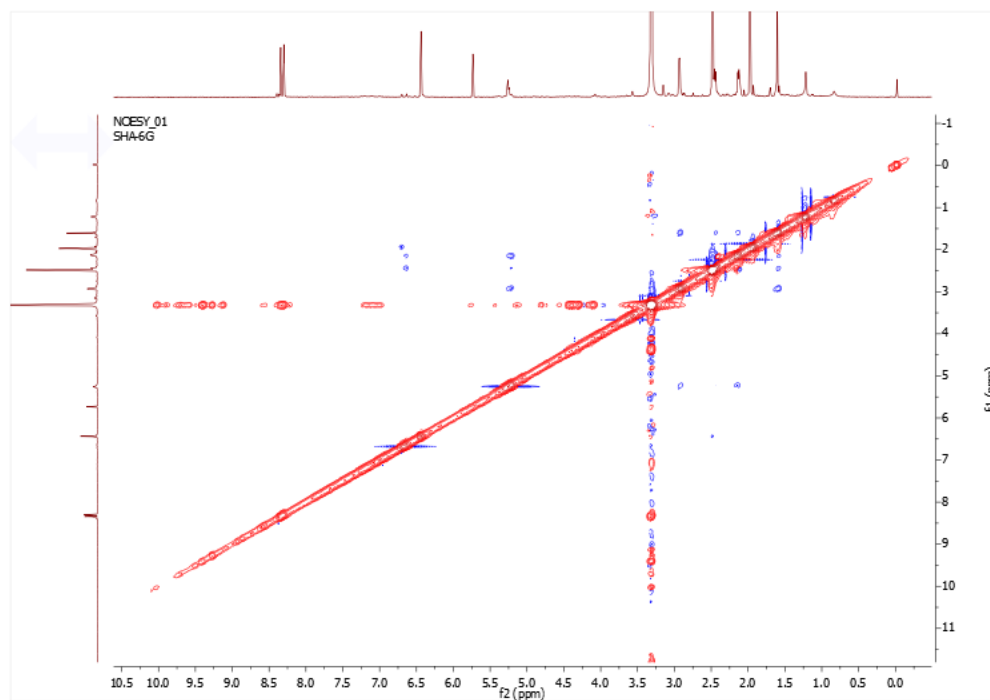

**Figure S10.** HRESIMS spectrum of compound **1**.

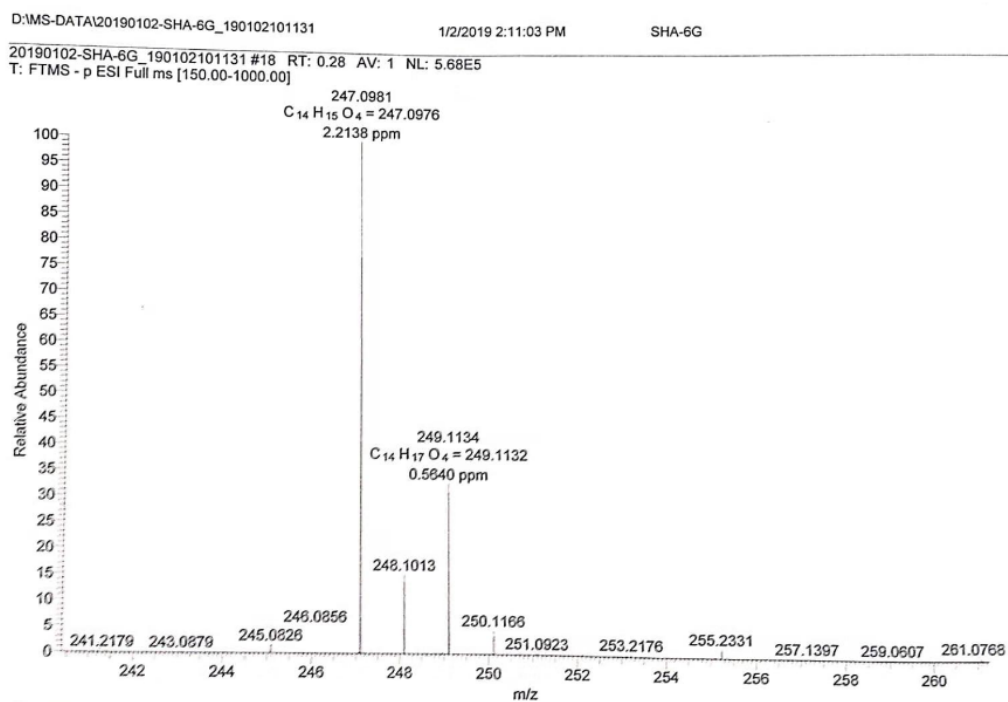



**Figure S11.** IR spectrum of compound **1**.

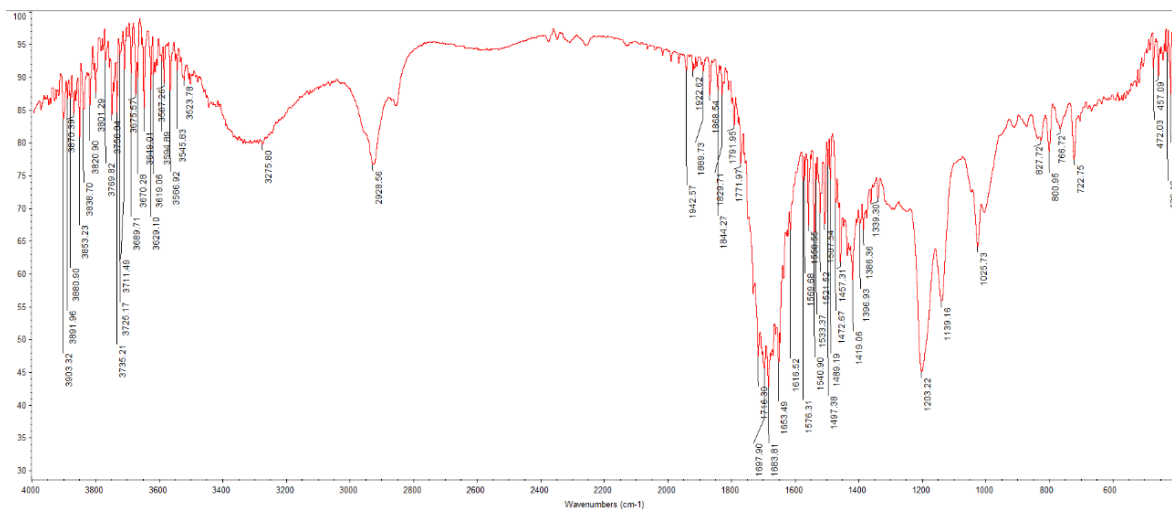

**Figure S12.** UV spectrum of compound **1**.

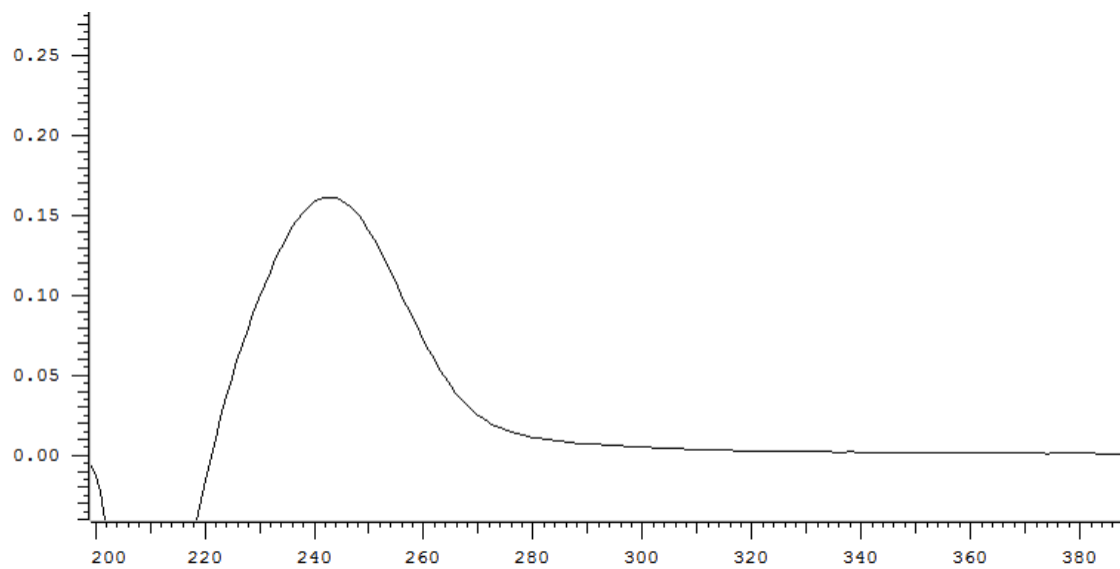

**Figure S13.**  $^1\text{H}$  NMR (500 MHz,  $\text{DMSO-}d_6$ ) spectrum of compound **2**.

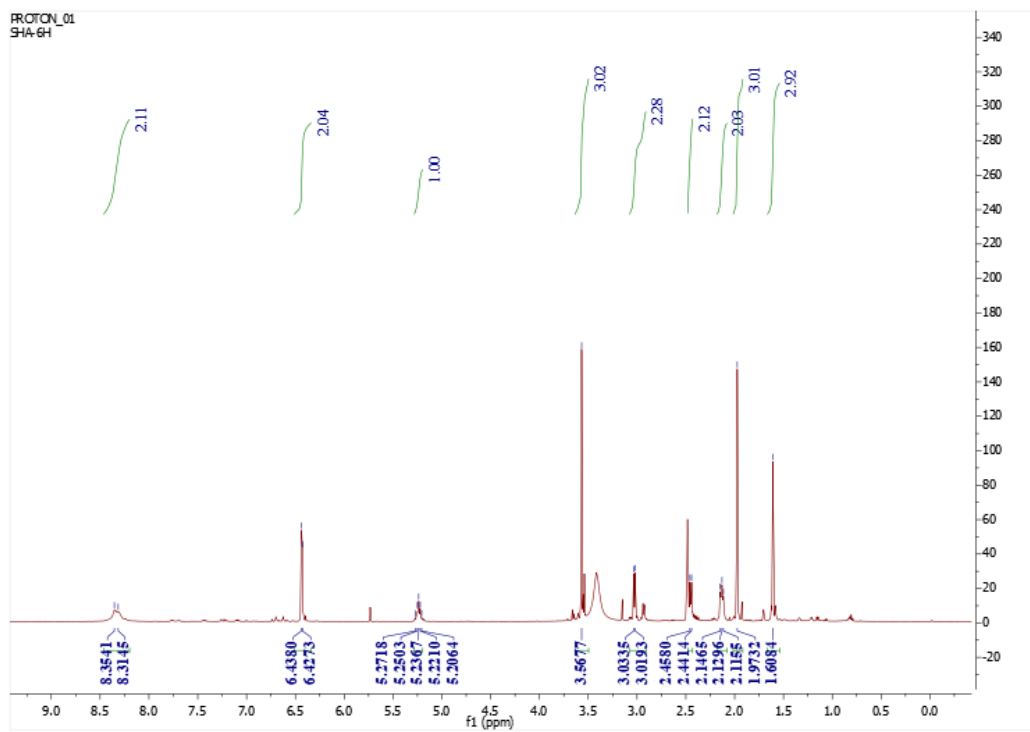

**Figure S14.**  $^{13}\text{C}$  NMR (125 MHz,  $\text{DMSO-}d_6$ ) spectrum of compound **2**.

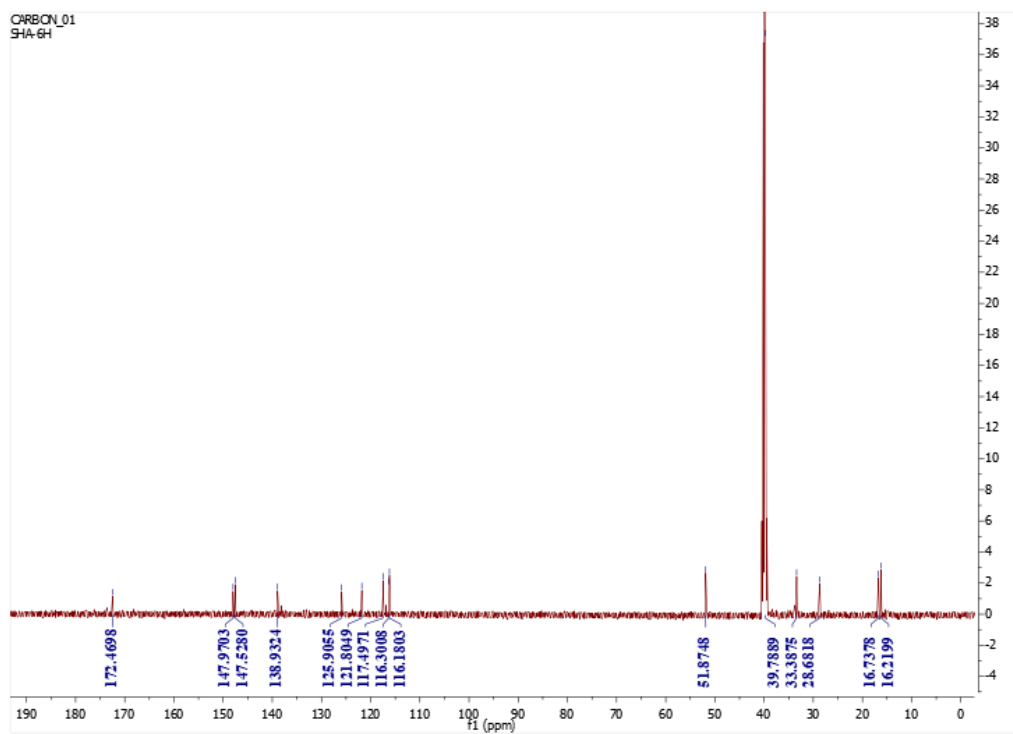

**Figure S15.** DEPT (125 MHz, DMSO-*d*<sub>6</sub>) spectrum of compound **2**.

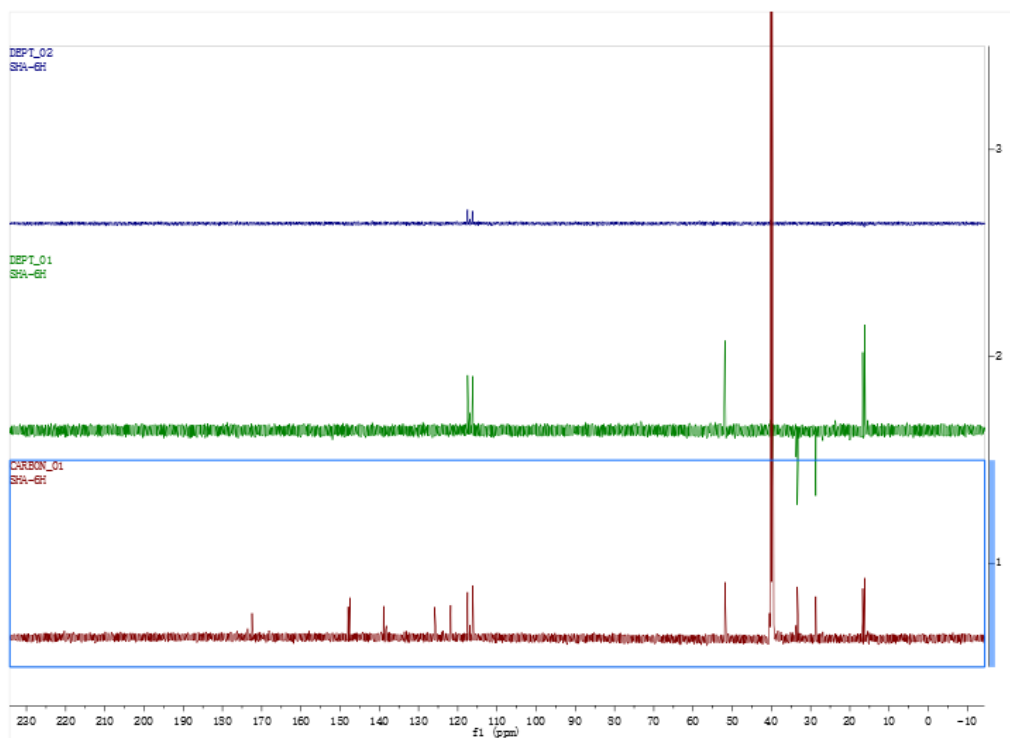

**Figure S16.** <sup>1</sup>H-<sup>1</sup>H COSY spectrum of compound **2** in DMSO-*d*<sub>6</sub>.

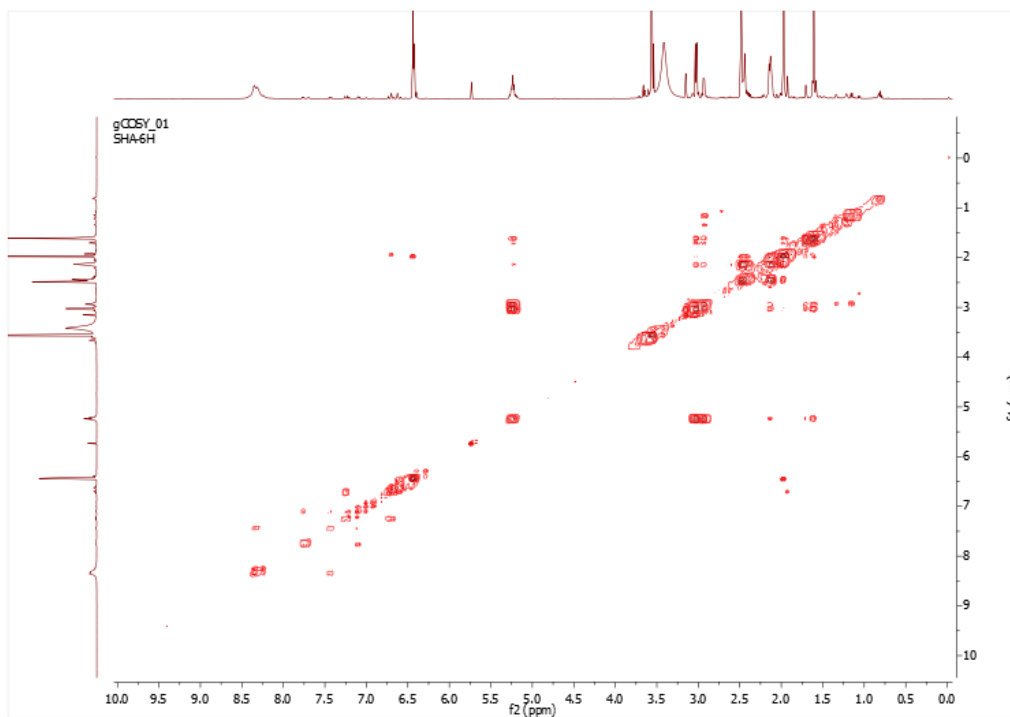

**Figure S17.** HSQC spectrum of compound **2** in DMSO-*d*<sub>6</sub>.

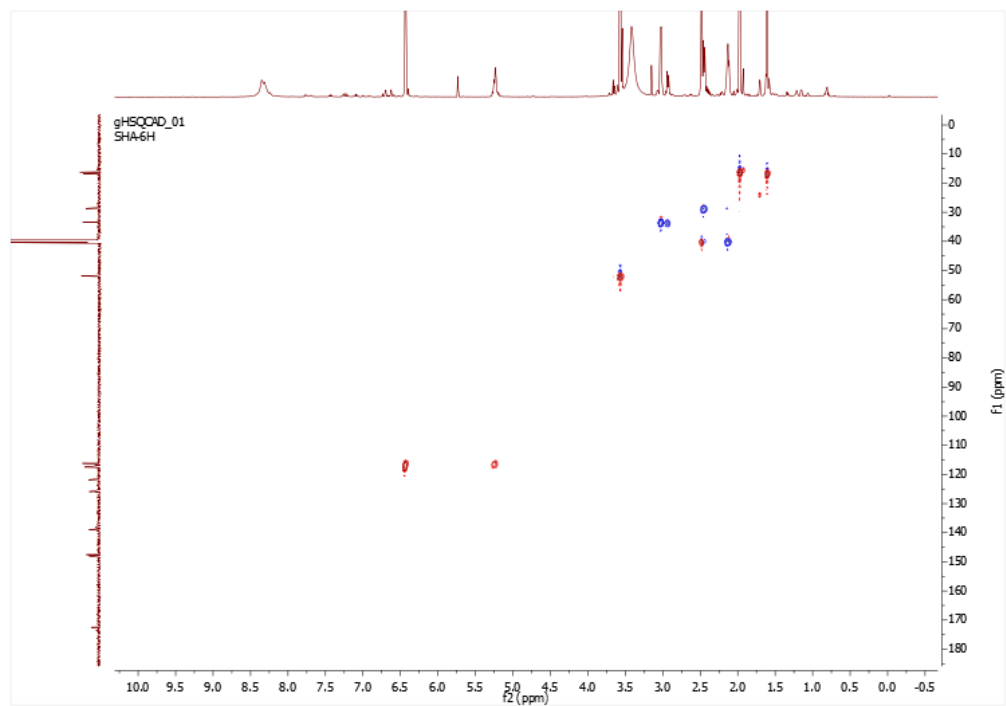

**Figure S18.** <sup>1</sup>H-<sup>13</sup>C HMBC spectrum of compound **2** in DMSO-*d*<sub>6</sub>.

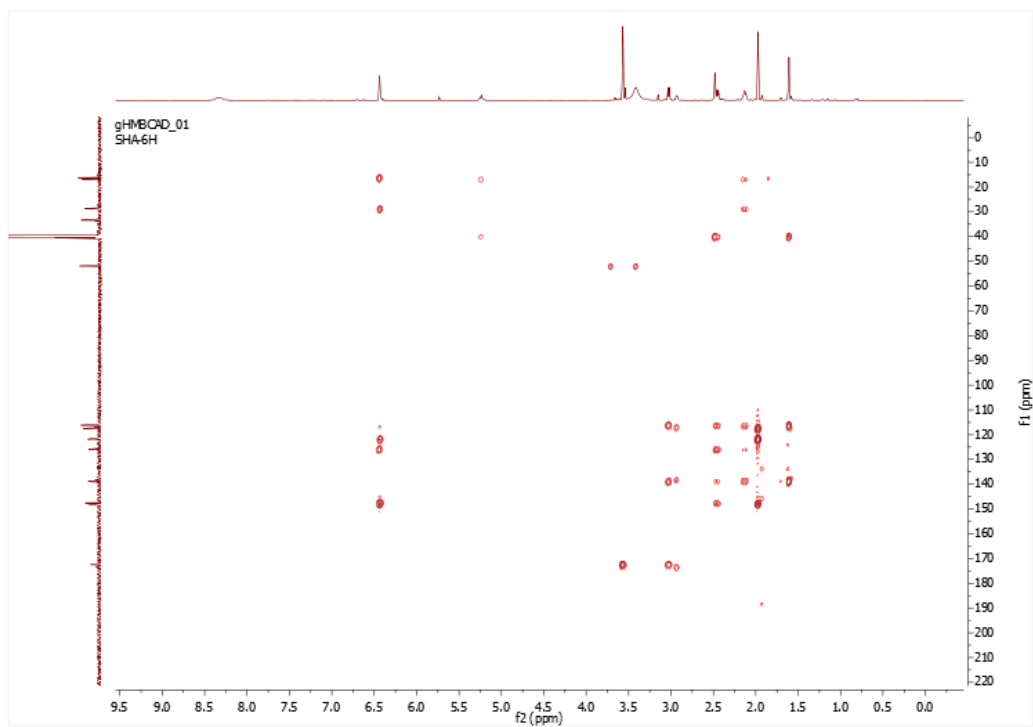

**Figure S19.** HRESIMS spectrum of compound 2.

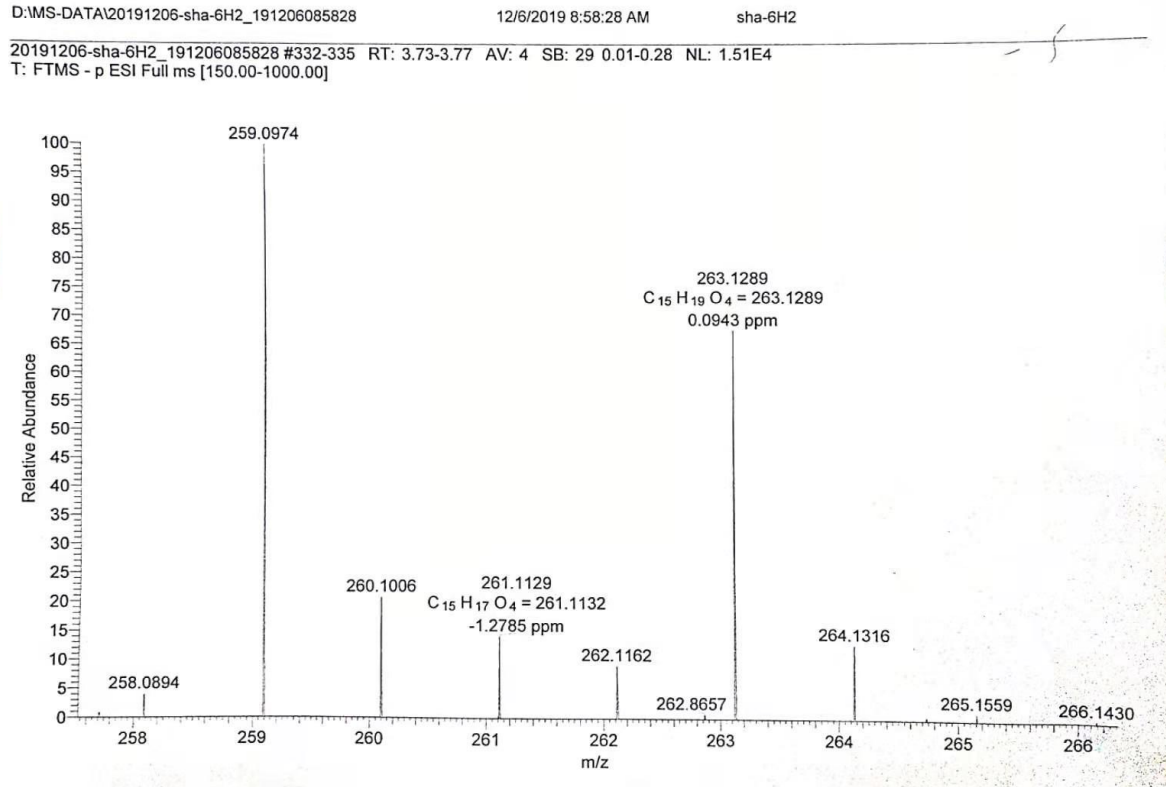

**Figure S20.** IR spectrum of compound 2.

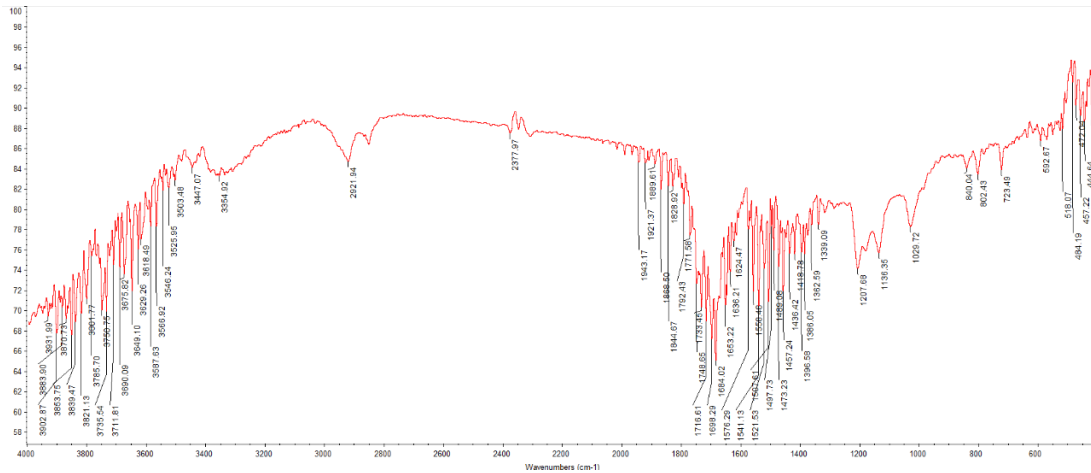

**Figure S21.** UV spectrum of compound **2**.

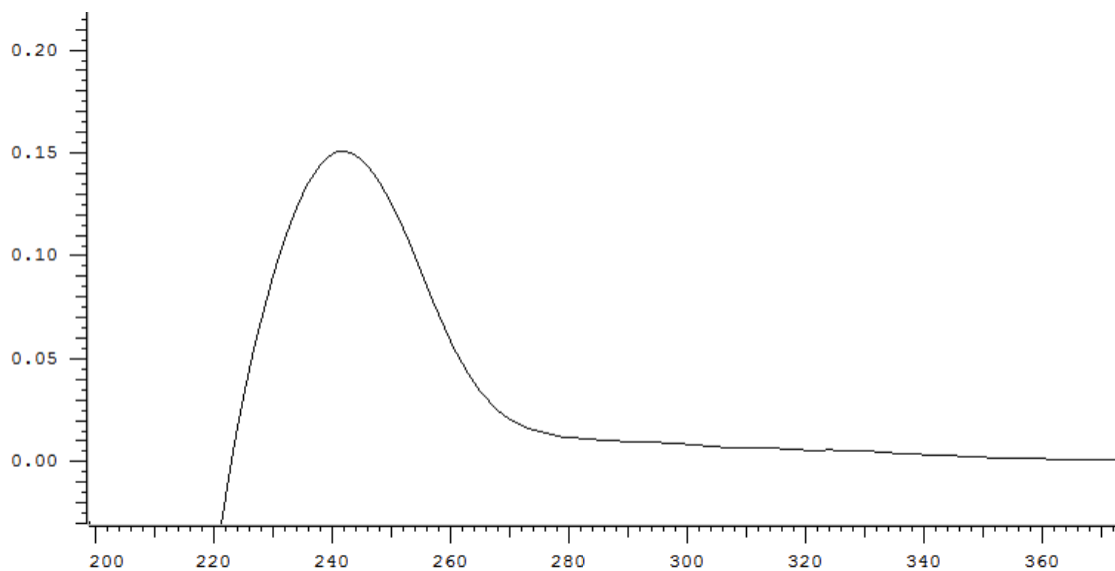

**Figure S22.**  $^1\text{H}$  NMR (500 MHz,  $\text{DMSO-}d_6$ ) spectrum of compound **3**.

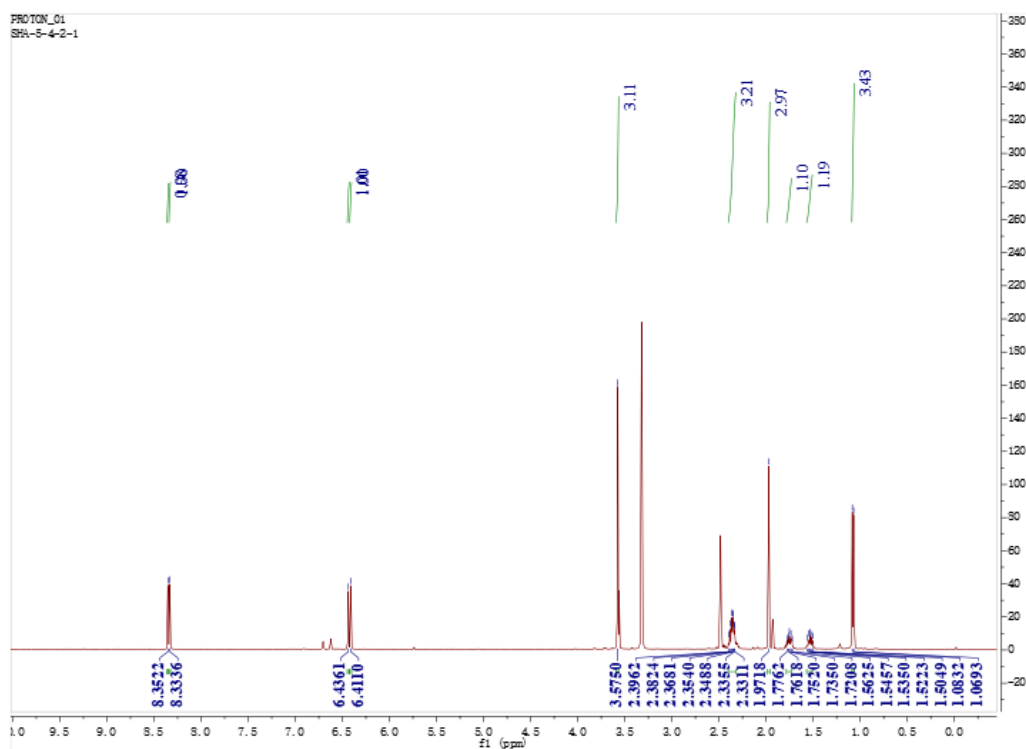

**Figure S23.**  $^{13}\text{C}$  NMR (125 MHz,  $\text{DMSO-}d_6$ ) spectrum of compound **3**.

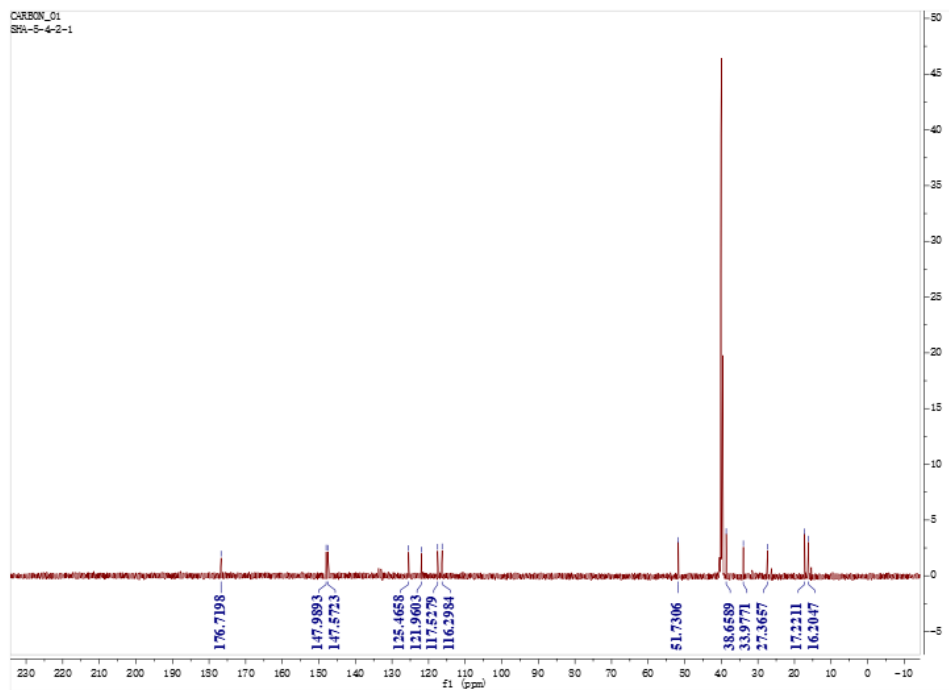

**Figure S24.** DEPT (125 MHz,  $\text{DMSO-}d_6$ ) spectrum of compound **3**.

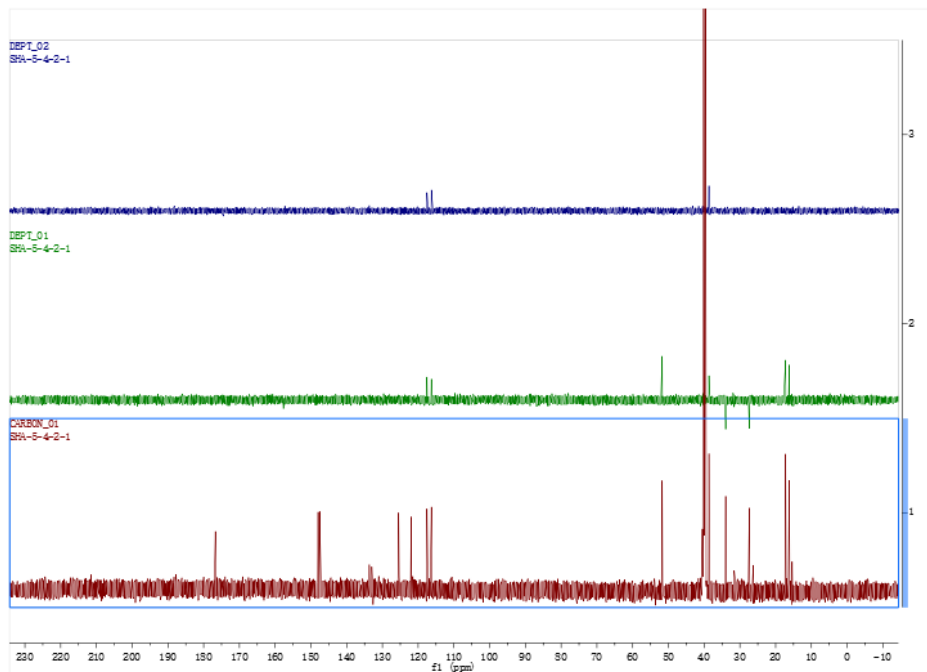

**Figure S25.**  $^1\text{H}$ - $^1\text{H}$  COSY spectrum of compound **3** in  $\text{DMSO-}d_6$ .

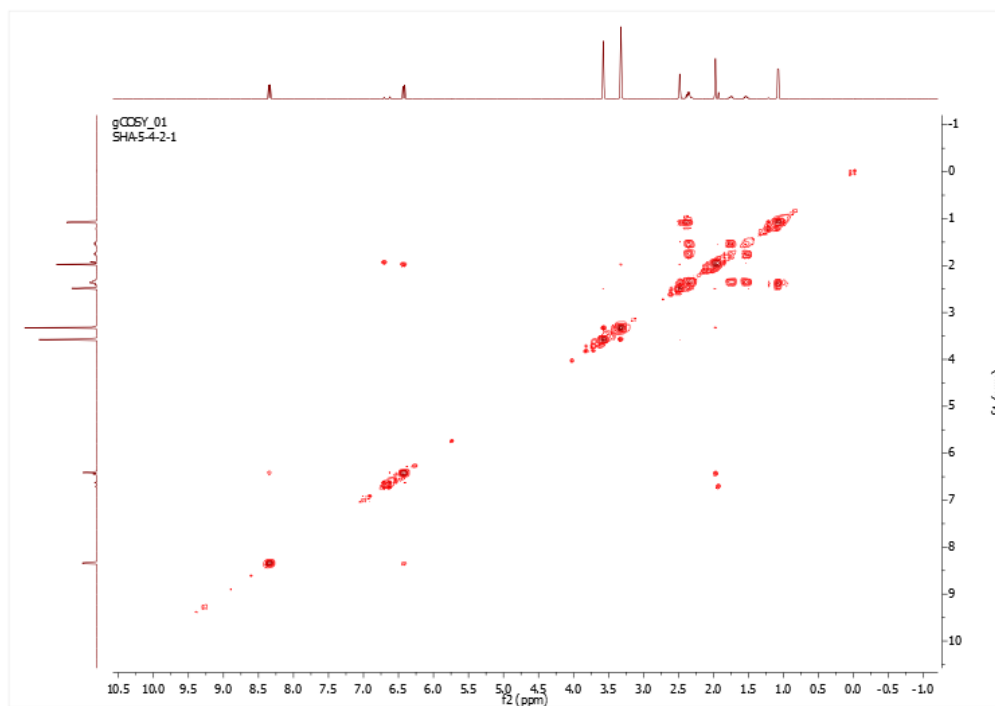

**Figure S26.** HSQC spectrum of compound **3** in  $\text{DMSO-}d_6$ .

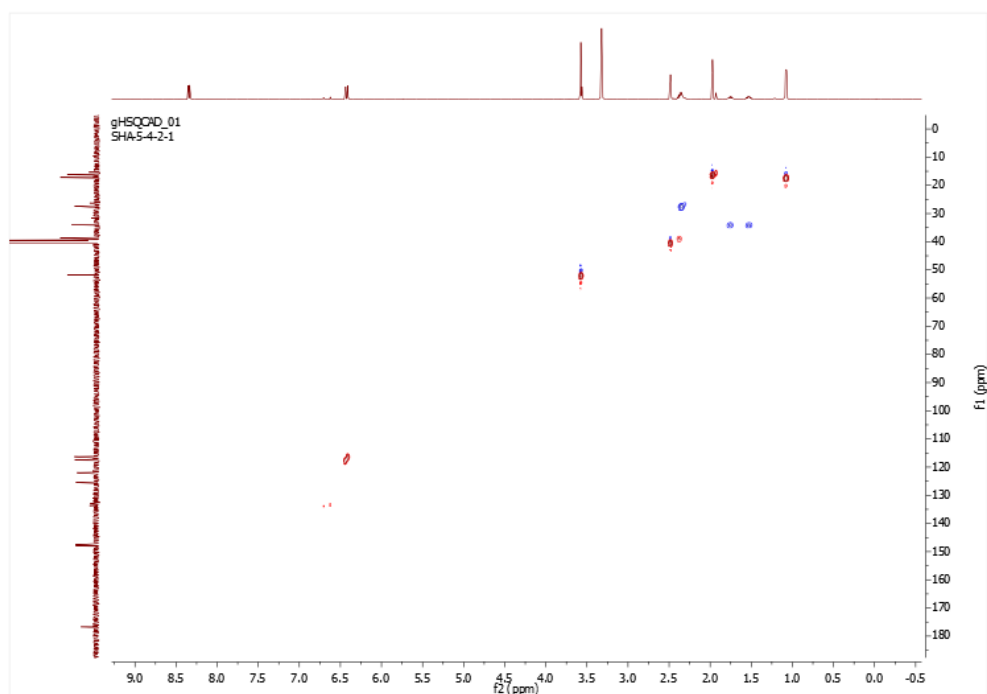



**Figure S27.**  $^1\text{H}$ - $^{13}\text{C}$  HMBC spectrum of compound **3** in  $\text{DMSO-}d_6$ .

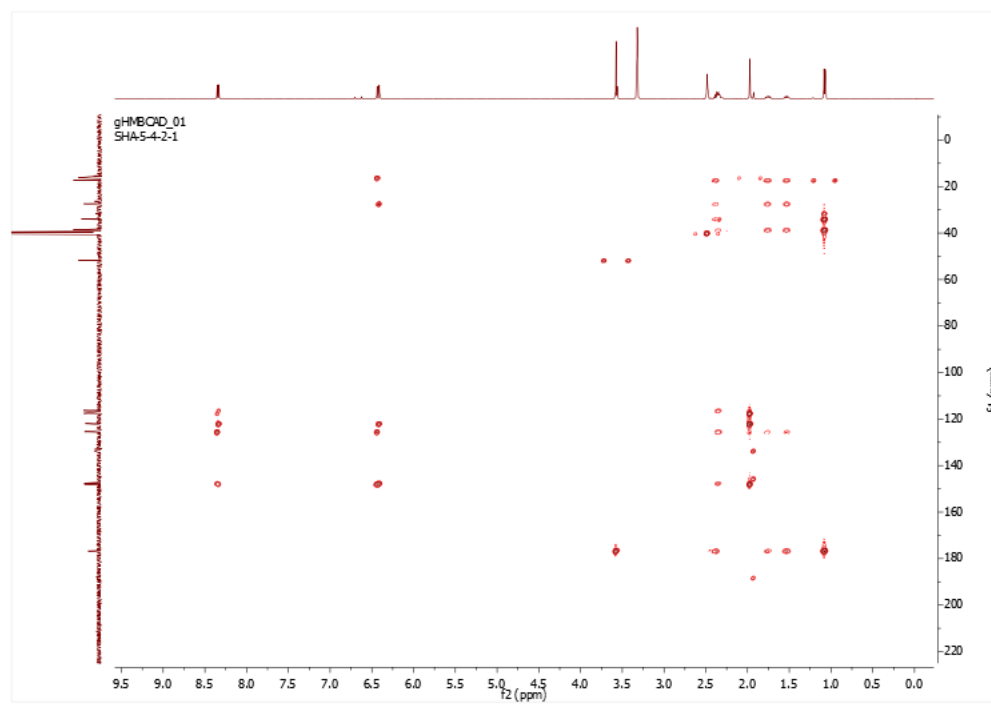

**Figure S28.** NOESY spectrum of compound **3** in  $\text{DMSO-}d_6$ .

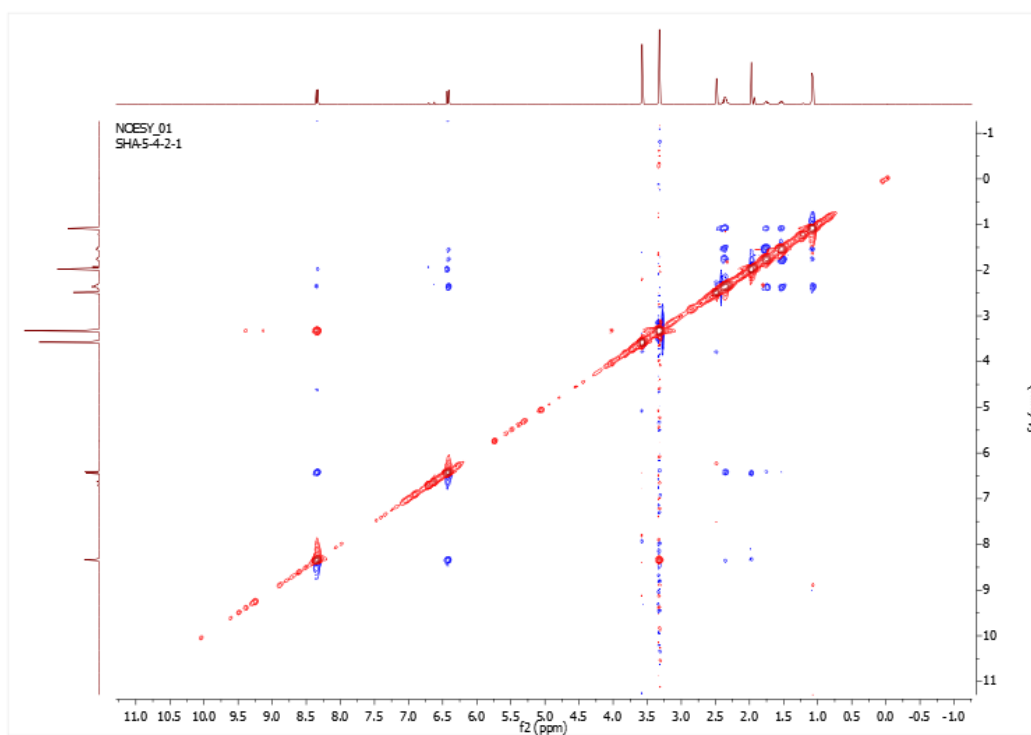

Figure S29. HRESIMS spectrum of compound 3.

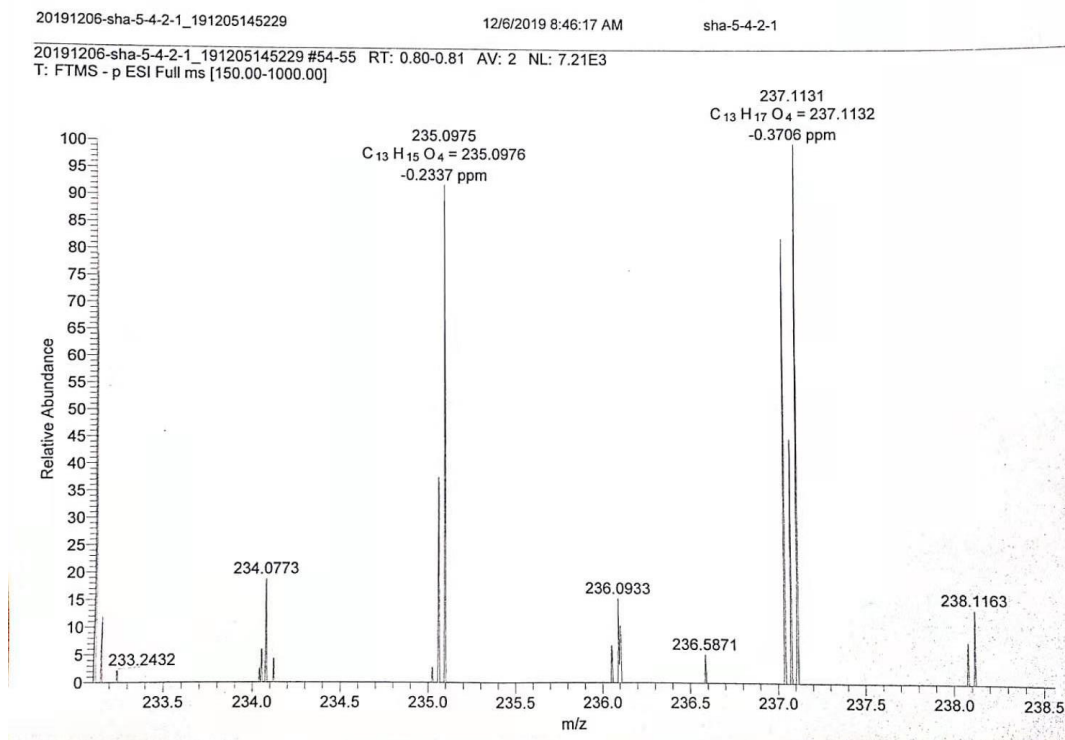

Figure S30. IR spectrum of compound 3.

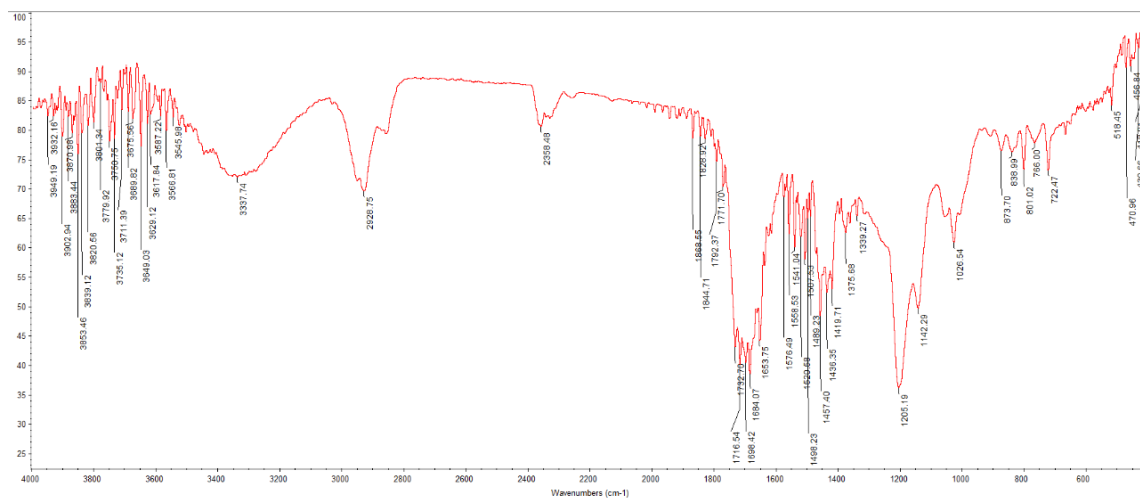

**Figure S31.** UV spectrum of compound **3**.

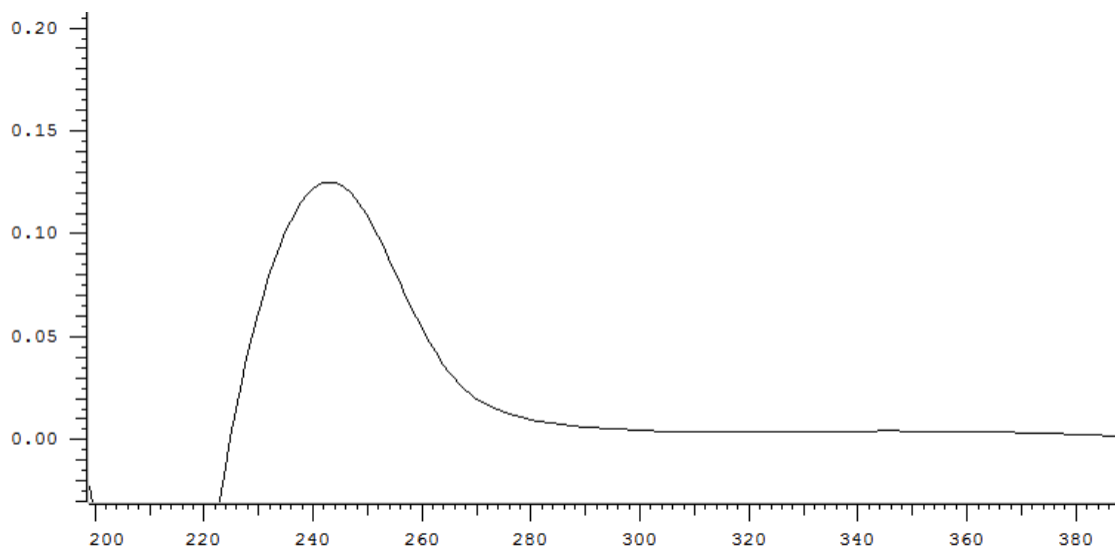

**Figure S32.**  $^1\text{H}$  NMR (500 MHz,  $\text{CDCl}_3$ ) spectrum of compound **1**.

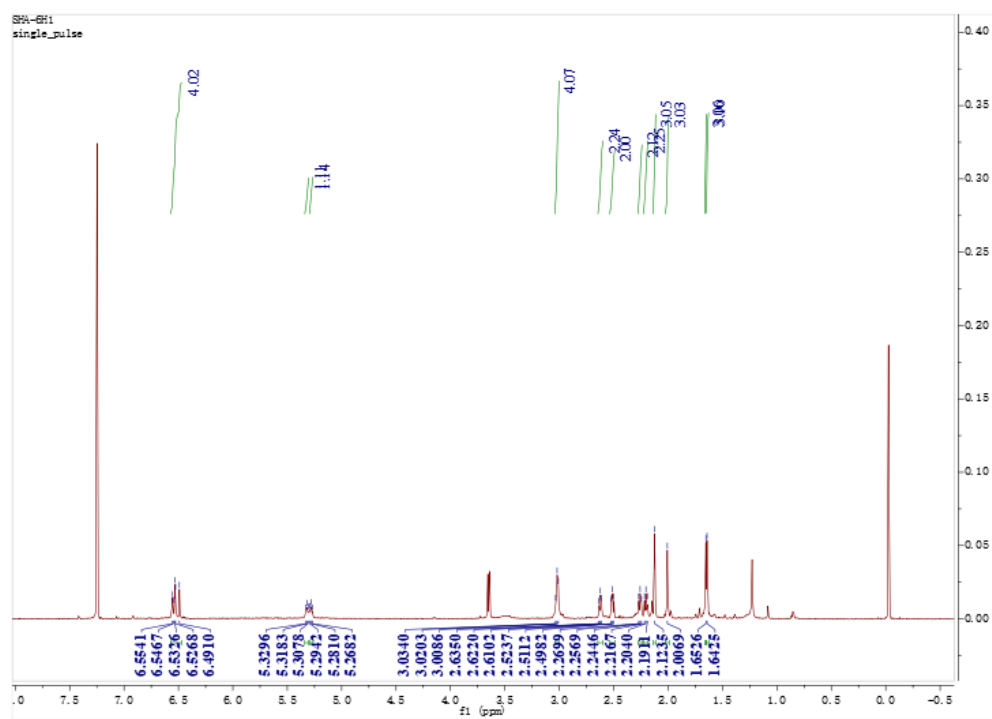

**Figure S33.**  $^{13}\text{C}$  NMR (125 MHz,  $\text{CDCl}_3$ ) spectrum of compound **1**.

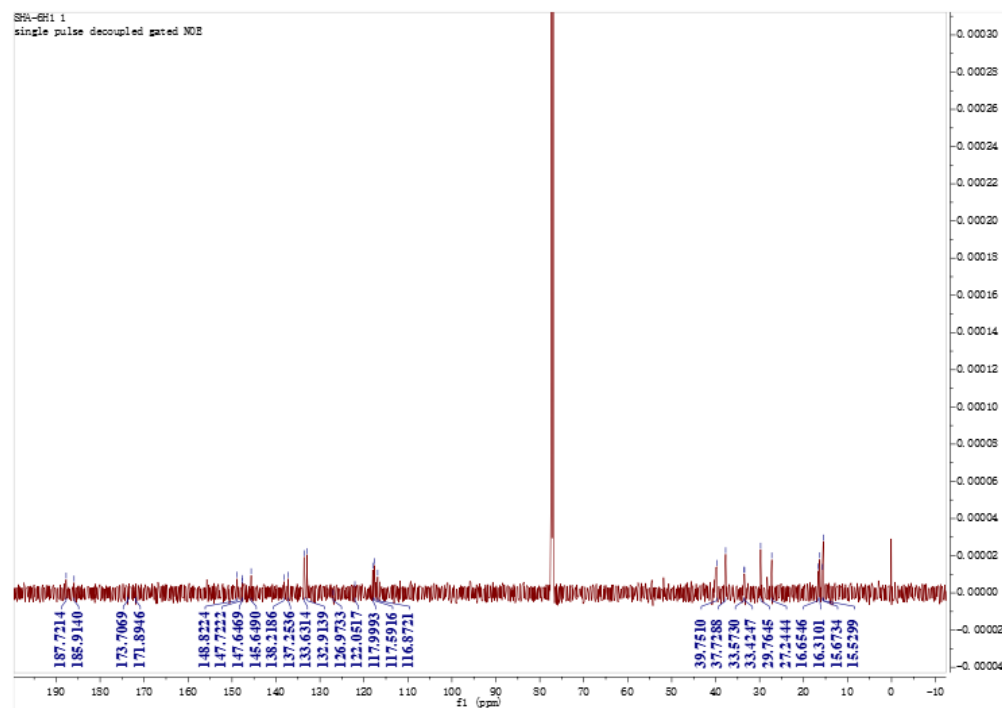

**Figure S34.** DEPT (125 MHz,  $\text{CDCl}_3$ ) spectrum of compound **1**.

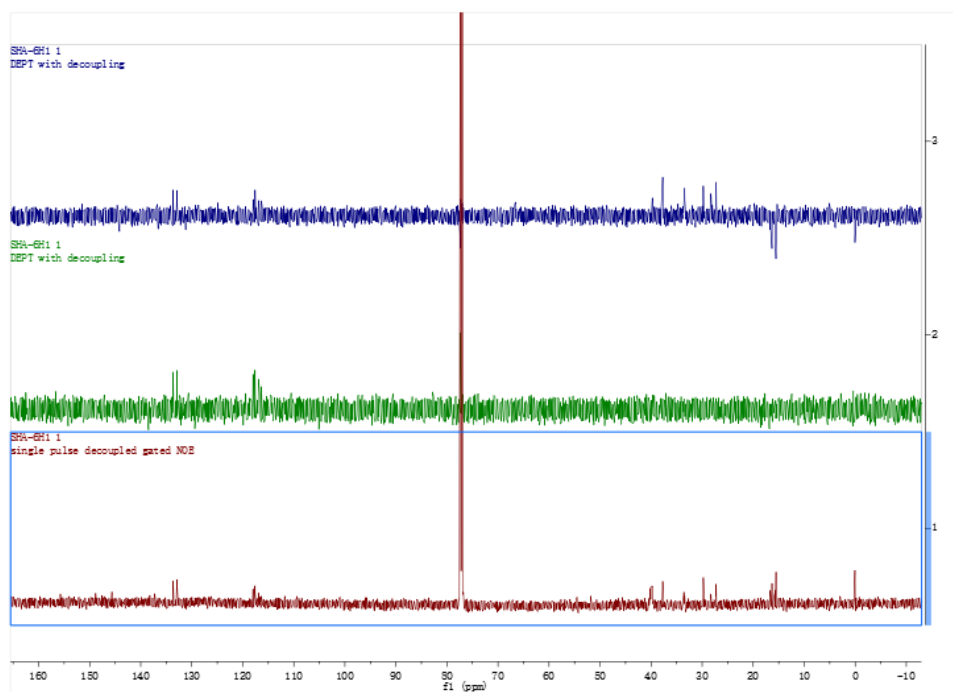

**Figure S35.**  $^1\text{H}$ - $^1\text{H}$  COSY spectrum of compound **1** in  $\text{CDCl}_3$ .

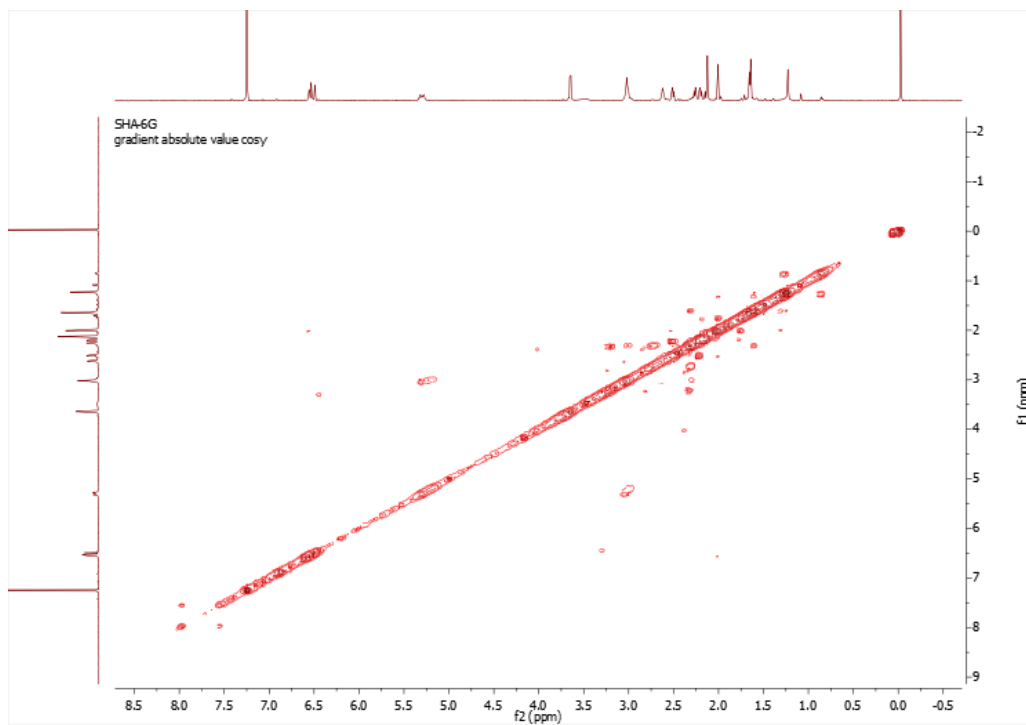

**Figure S36.**  $^1\text{H}$ - $^{13}\text{C}$  HSQC spectrum of compound **1** in  $\text{CDCl}_3$ .

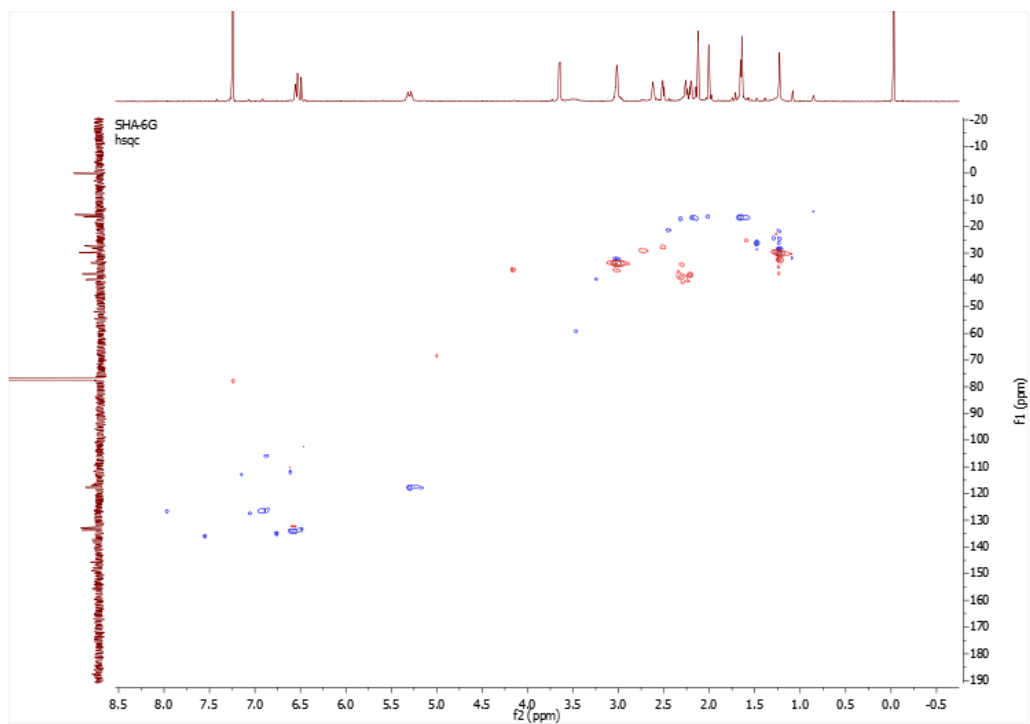

**Figure S37.**  $^1\text{H}$ - $^{13}\text{C}$  HMBC spectrum of compound **1** in  $\text{CDCl}_3$ .

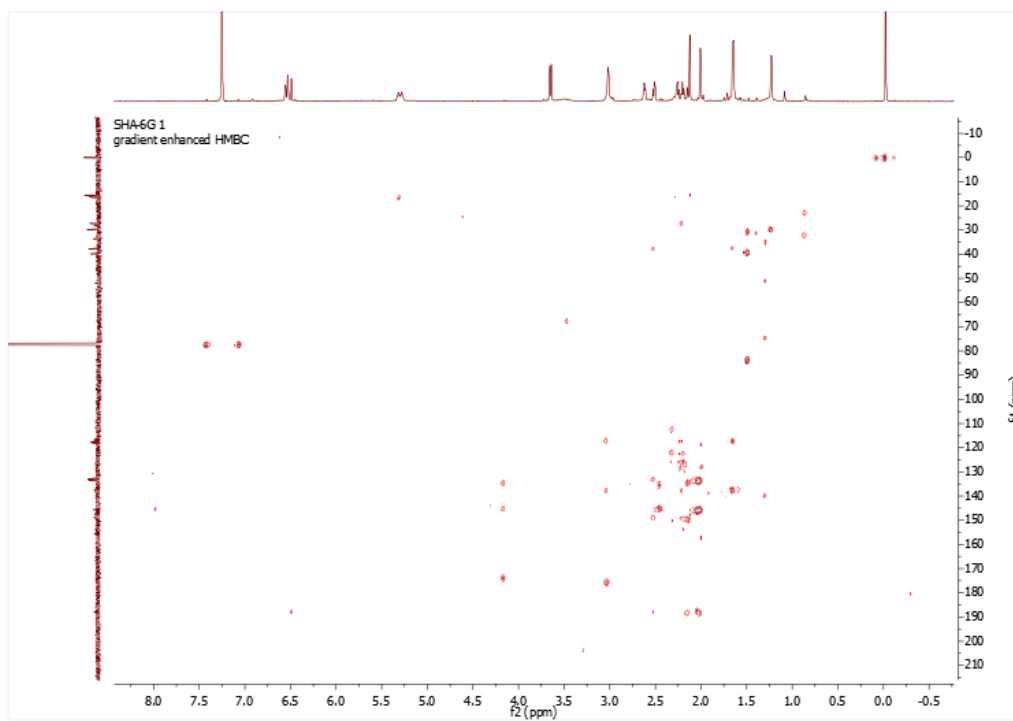

**Figure S38.** NOESY spectrum of compound **1** in  $\text{CDCl}_3$ .

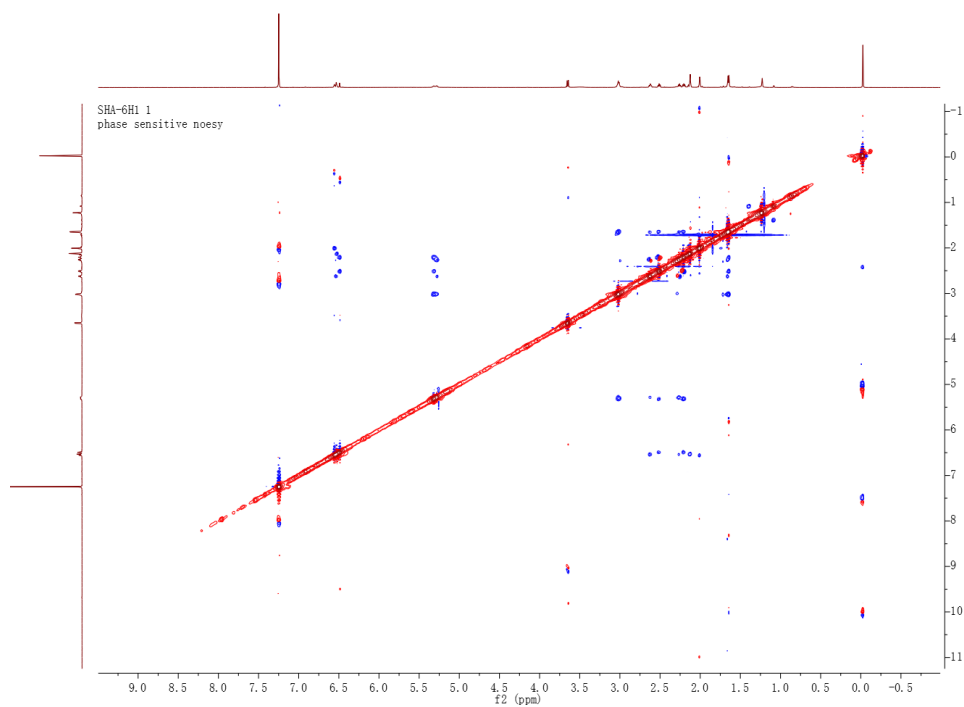

**Figure S39.**  $^1\text{H}$  NMR (500 MHz,  $\text{CDCl}_3$ ) spectrum of compound 2.

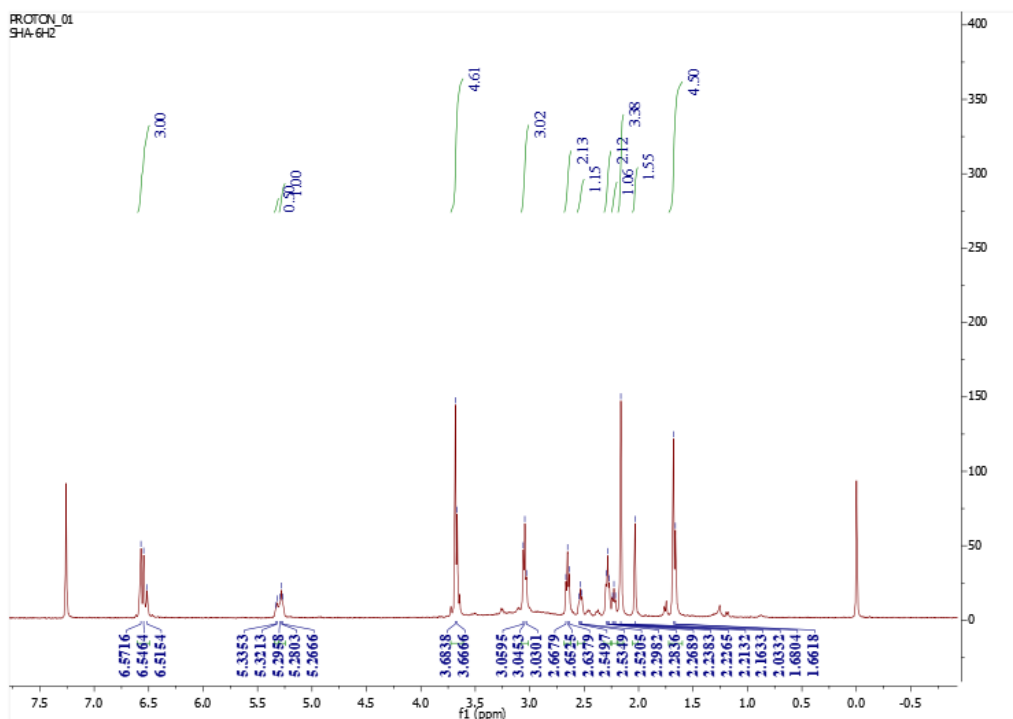

**Figure S40.**  $^{13}\text{C}$  NMR (125 MHz,  $\text{CDCl}_3$ ) spectrum of compound 2.

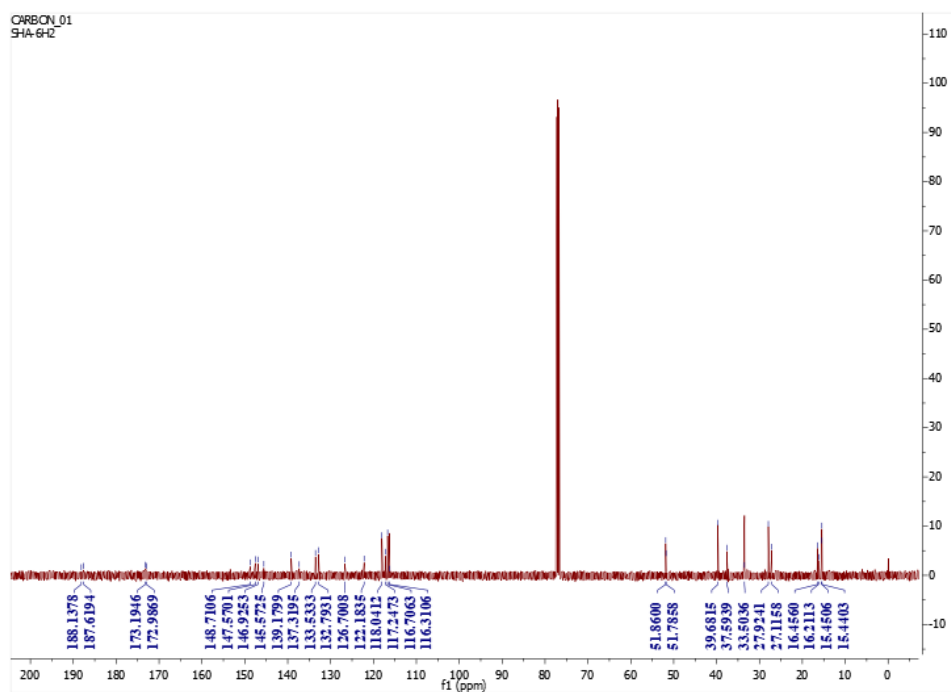

**Figure S41.** DEPT (125 MHz, CDCl<sub>3</sub>) spectrum of compound **2**.

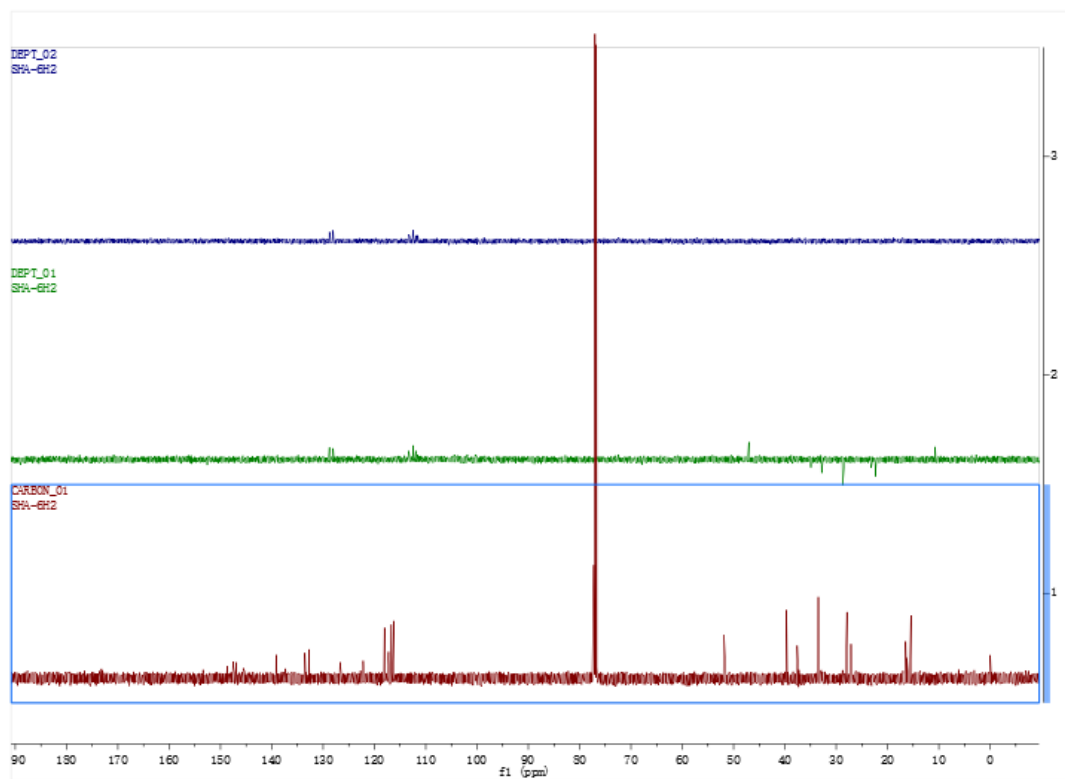

**Figure S42.** <sup>1</sup>H-<sup>1</sup>H COSY spectrum of compound **2** in CDCl<sub>3</sub>.

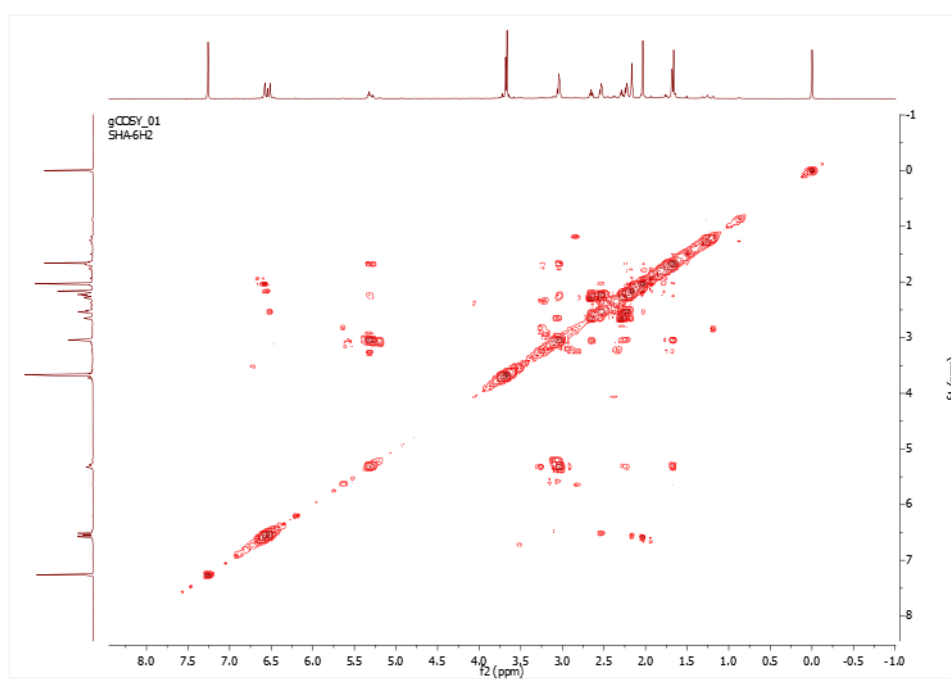



**Figure S43.** HSQC spectrum of compound **2** in CDCl<sub>3</sub>.

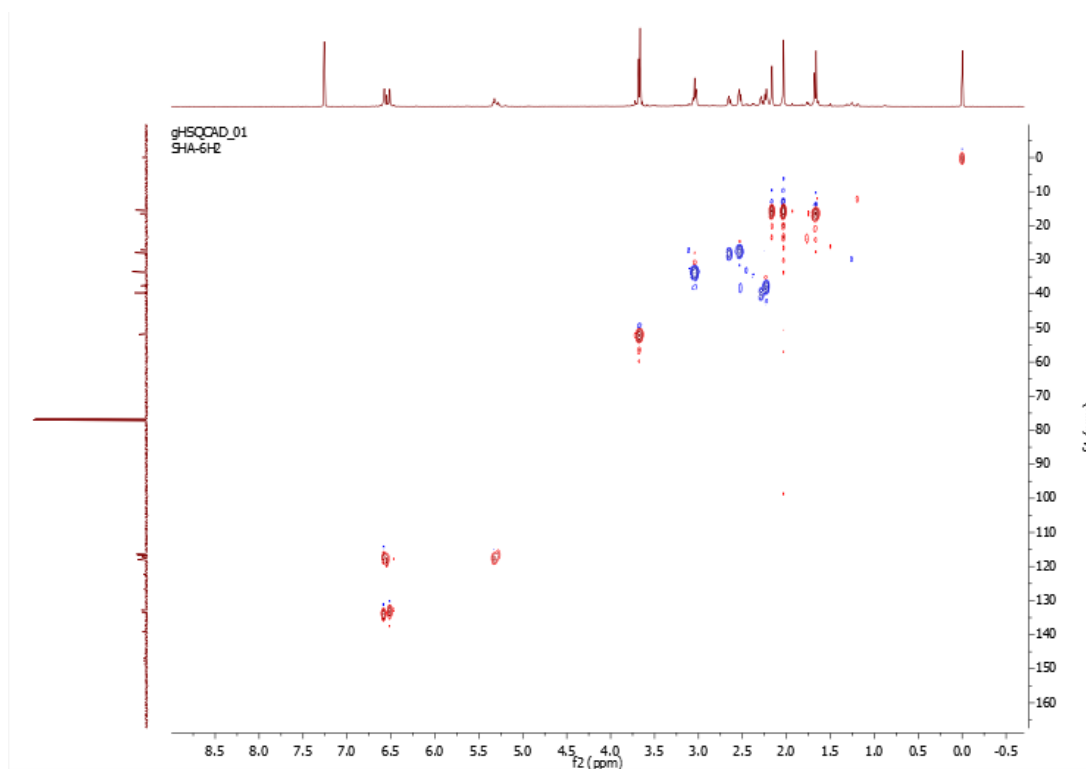

**Figure S44.** <sup>1</sup>H-<sup>13</sup>C HMBC spectrum of compound **2** in CDCl<sub>3</sub>.

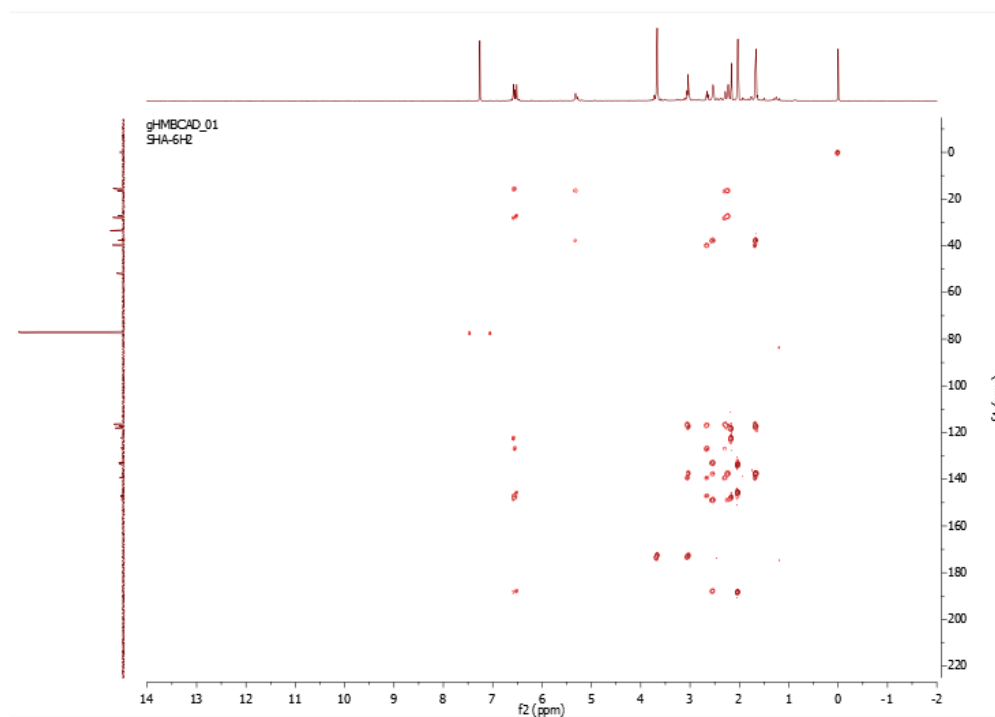

**Figure S45.** NOESY spectrum of compound **2** in CDCl<sub>3</sub>.

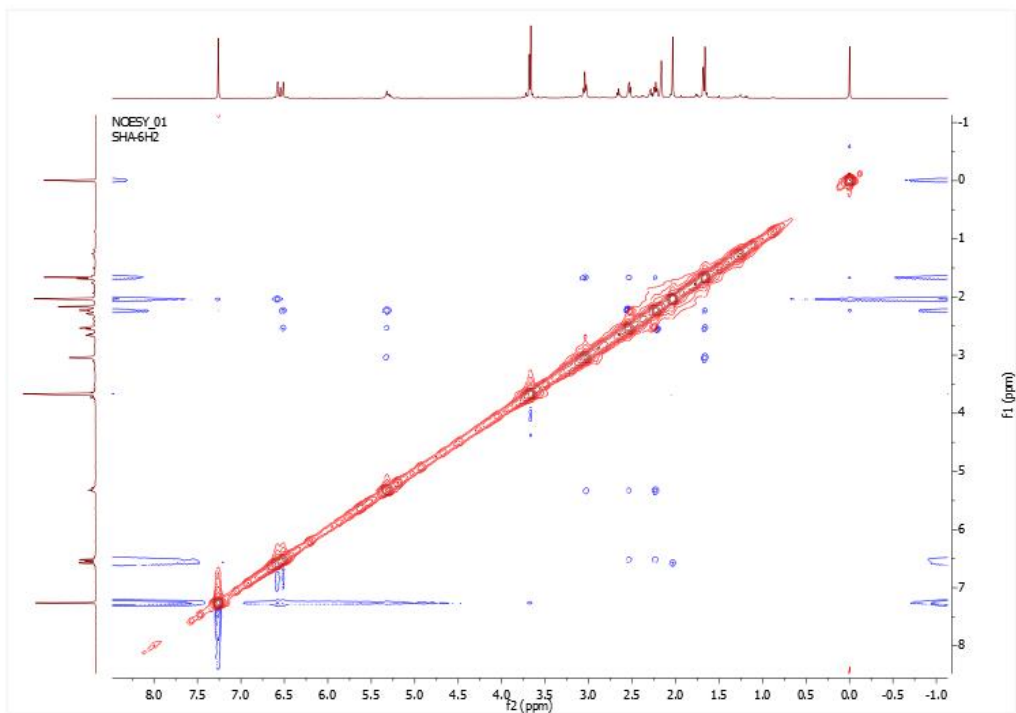

**Figure S46.** <sup>1</sup>H NMR (500 MHz, CDCl<sub>3</sub>) spectrum of compound **3**.

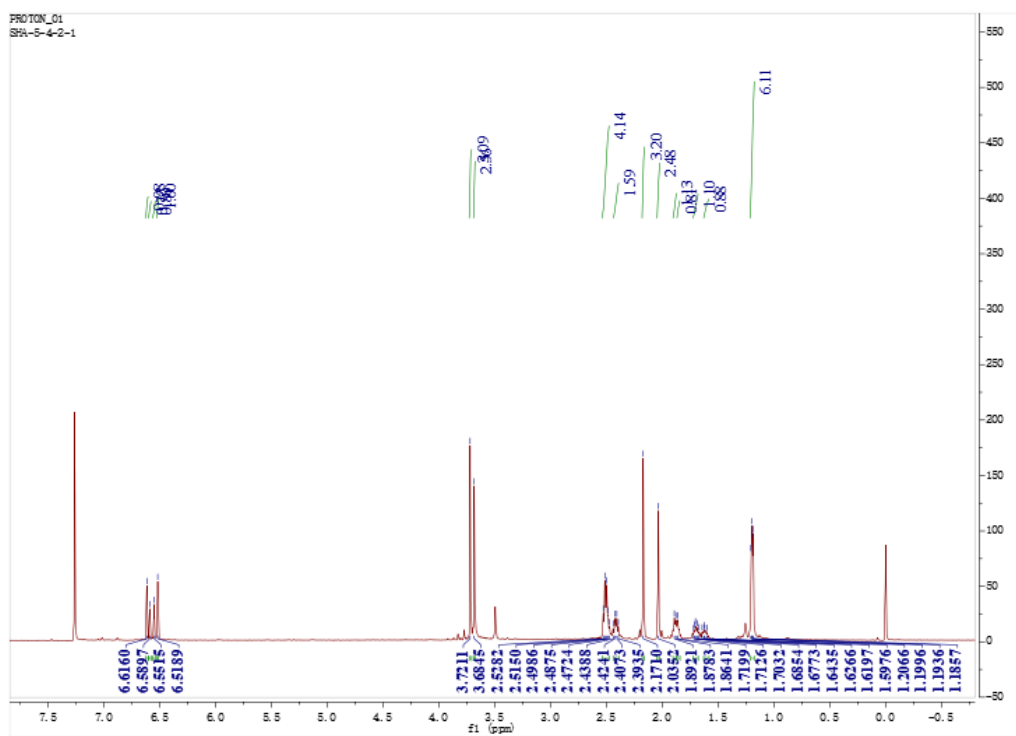

Figure S47.  $^{13}\text{C}$  NMR (125 MHz,  $\text{CDCl}_3$ ) spectrum of compound **3**.

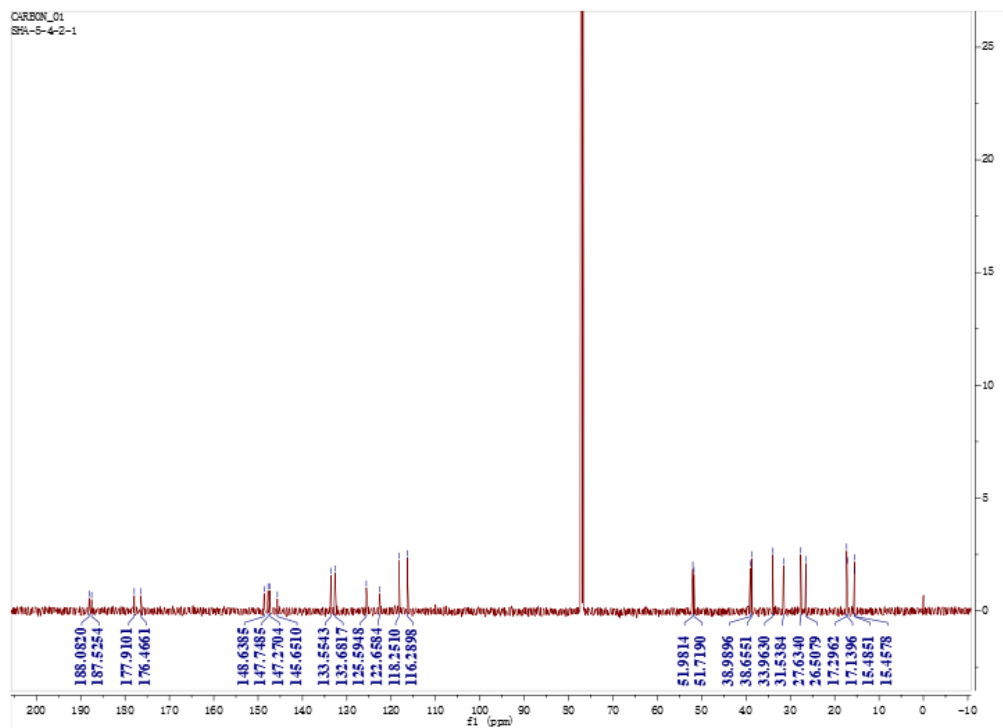

Figure S48. DEPT (125 MHz,  $\text{CDCl}_3$ ) spectrum of compound **3**.

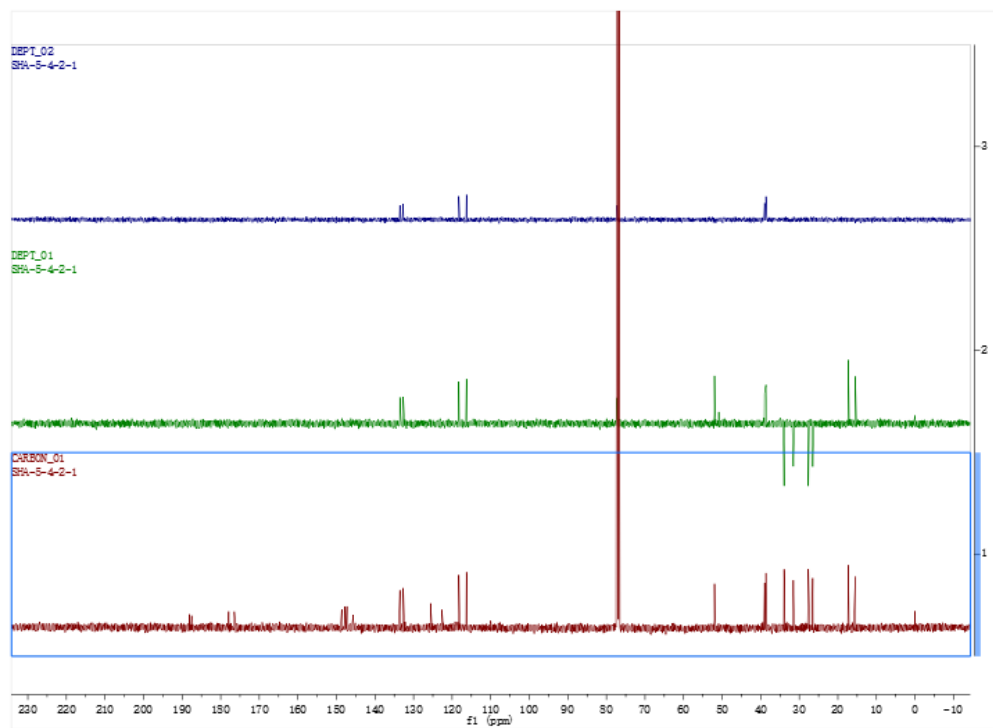

**Figure S49.**  $^1\text{H}$ - $^1\text{H}$  COSY spectrum of compound **3** in  $\text{CDCl}_3$ .

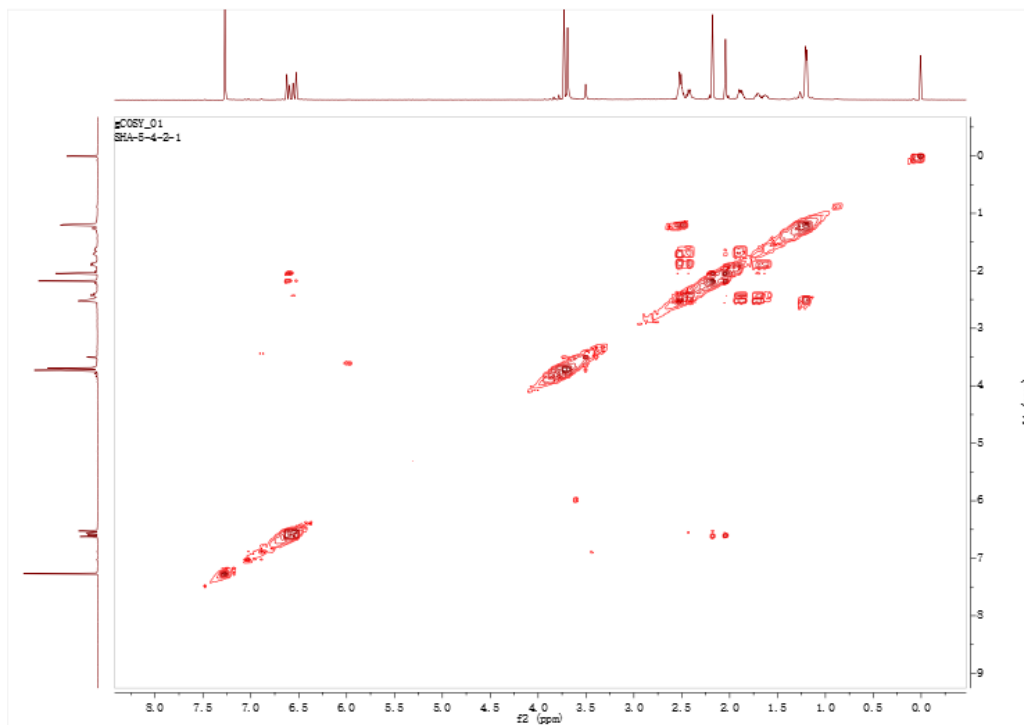

**Figure S50.** HSQC spectrum of compound **3** in  $\text{CDCl}_3$ .

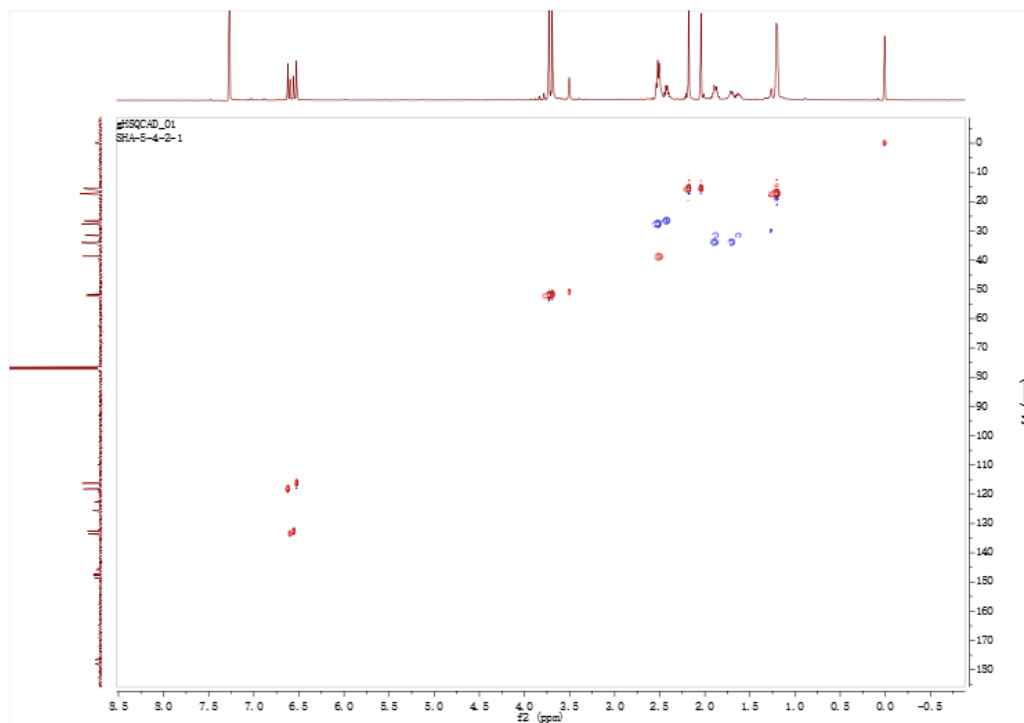

**Figure S51.**  $^1\text{H}$ - $^{13}\text{C}$  HMBC spectrum of compound **3** in  $\text{CDCl}_3$ .

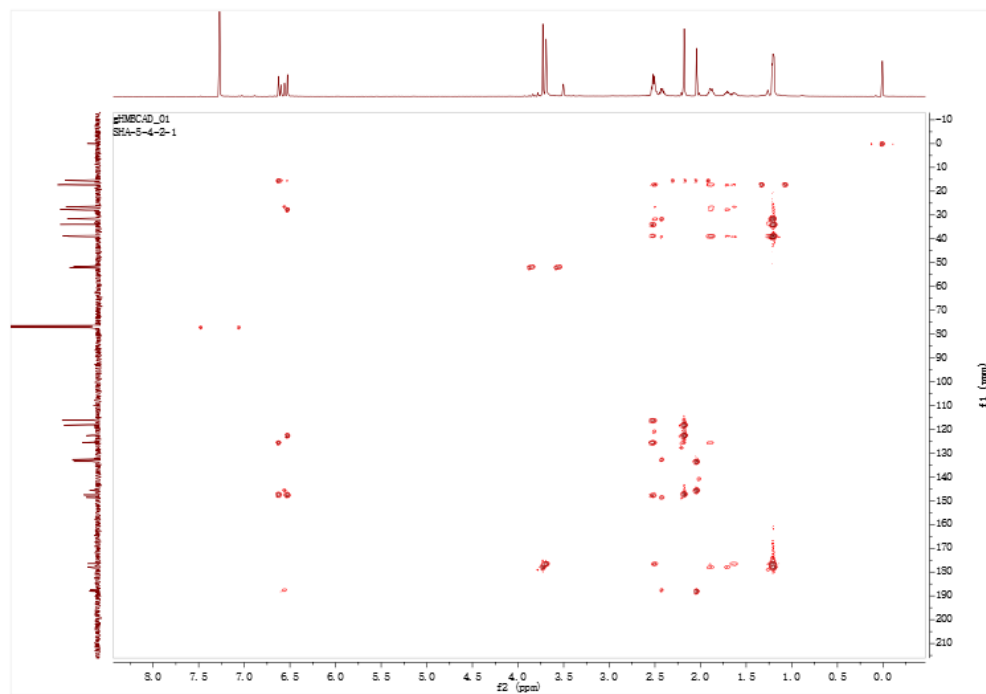

Supplement: marinedrugs-18-00071-s001.pdf [file marinedrugs-18-00071-s001.pdf]
